# Supplementary material for: Development of a core outcome set for behavioural weight management programmes for adults with overweight and obesity: protocol for obtaining expert consensus using Delphi methodology
Source: PubMed Central journal article supplement (PMC6398651; doi:10.1136/bmjopen-2018-025193), 2019-03-01
Supplement: bmjopen-2018-025193.draft_revisions.pdf [file bmjopen-2018-025193.draft_revisions.pdf]

# BMJ Open

BMJ Open is committed to open peer review. As part of this commitment we make the peer review history of every article we publish publicly available.

When an article is published we post the peer reviewers' comments and the authors' responses online. We also post the versions of the paper that were used during peer review. These are the versions that the peer review comments apply to.

The versions of the paper that follow are the versions that were submitted during the peer review process. They are not the versions of record or the final published versions. They should not be cited or distributed as the published version of this manuscript.

BMJ Open is an open access journal and the full, final, typeset and author-corrected version of record of the manuscript is available on our site with no access controls, subscription charges or pay-per-view fees (<http://bmjopen.bmj.com>).

If you have any questions on BMJ Open's open peer review process please email [editorial.bmjopen@bmj.com](mailto:editorial.bmjopen@bmj.com)

# BMJ Open

## Study Protocol for Developing a Core Outcome Set for Lifestyle Weight Management Programmes by Expert Consensus

|                               |                                                                                                                                                                                                                                                                                                                                                       |
|-------------------------------|-------------------------------------------------------------------------------------------------------------------------------------------------------------------------------------------------------------------------------------------------------------------------------------------------------------------------------------------------------|
| Journal:                      | <i>BMJ Open</i>                                                                                                                                                                                                                                                                                                                                       |
| Manuscript ID                 | bmjopen-2018-025193                                                                                                                                                                                                                                                                                                                                   |
| Article Type:                 | Protocol                                                                                                                                                                                                                                                                                                                                              |
| Date Submitted by the Author: | 03-Jul-2018                                                                                                                                                                                                                                                                                                                                           |
| Complete List of Authors:     | Mackenzie, Ruth; University of Glasgow, Institute of Cardiovascular and Medical Sciences<br>Ells, Louisa; Teeside University, School of Health and social Care<br>Simpson, Sharon; University of Glasgow, MRC/CSO Social and Public Health Sciences Unit<br>Logue, Jennifer; University of Glasgow, Institute of Cardiovascular and Medical Sciences; |
| Keywords:                     | core outcomes, lifestyle weight management, Delphi                                                                                                                                                                                                                                                                                                    |
|                               |                                                                                                                                                                                                                                                                                                                                                       |

SCHOLARONE™  
Manuscripts

1  
2  
3 **Study Protocol for Developing a Core Outcome Set for Lifestyle Weight Management Programmes**  
4 **by Expert Consensus**  
5

6 *Ruth M. Mackenzie<sup>1</sup>, Louisa J. Ells<sup>2</sup>, Sharon Anne Simpson<sup>3</sup>, Jennifer Logue<sup>1</sup>*  
7

8  
9 <sup>1</sup> Institute of Cardiovascular and Medical Sciences, University of Glasgow  
10

11 <sup>2</sup> School of Health & Social Care, Teeside University  
12

13 <sup>3</sup> Institute of Health and Wellbeing, University of Glasgow  
14  
15

16  
17  
18 Corresponding Author:  
19

20 Jennifer Logue  
21

22  
23 Institute of Cardiovascular and Medical Sciences  
24

25 University of Glasgow  
26

27  
28 126 University Place  
29

30 Glasgow  
31

32 G12 8TA  
33

34  
35 [Jennifer.Logue@glasgow.ac.uk](mailto:Jennifer.Logue@glasgow.ac.uk)  
36  
37  
38  
39

40 **ABSTRACT**  
41

42 **Introduction:** Weight management interventions in research studies and in clinical practice differ in  
43 length, advice, frequency of meetings, staff, and cost. Very few real-world programmes have  
44 published outcomes for patients, and those that have published used different ways of reporting the  
45 information, making it impossible to compare interventions and further develop the evidence base.  
46 Developing a core outcome set for weight management interventions will allow different weight  
47 management programmes to be compared and reveal which interventions work best for which  
48 members of the population.  
49

50  
51 **Methods and analysis:** An expert group, comprised of 40 people who work in, refer to, or attend  
52 weight management programmes, will be asked to decide which outcomes services should report.  
53  
54  
55  
56  
57  
58  
59  
60

1  
2  
3 An online Delphi process will be employed to help the group reach consensus as to which outcomes  
4 should be measured and reported, and which definitions/instruments should be utilised in order to  
5 do so. The first stage of the Delphi process (3 rounds of questionnaires) will focus on outcomes while  
6 the second stage (3 additional rounds of questionnaires) will focus on definition/instrument  
7 selection.  
8  
9

10  
11 **Ethics and dissemination:** Ethical approval for this study has been received from the University of  
12 Glasgow College of Medical, Veterinary and Life Sciences Ethics Committee. With regard to  
13 disseminating results, a report will be submitted to our funding body, the Chief Scientist Office of the  
14 Scottish Government Health Department. In addition, early findings will be shared with Public Health  
15 England (PHE) and Health Scotland, and results communicated via conference presentations, peer  
16 review publication and our institutions' social media platforms.  
17  
18

19  
20 **Registration details:** The project has been registered with the COMET (Core Outcome Measures in  
21 Effectiveness Trials) Initiative (<http://www.comet-initiative.org/studies/details/1056>).  
22  
23  
24  
25  
26  
27

## 28 **STRENGTHS AND LIMITATIONS OF THIS STUDY**

- 29  
30  
31  
32  
33  
34  
35  
36  
37  
38  
39  
40  
41  
42  
43  
44  
45  
46  
47
- The major strength of this study is that it is the first of its kind and development of a core outcome set for lifestyle weight management programmes is much needed in order to standardise reporting which, in turn, will lead to a better evidence base and improvements in weight management provision.
  - It is a limitation that this study is wholly based in the United Kingdom (UK) as the results may need some minor adaptation to be suited to real-world programmes set within other healthcare systems.
  - However, we will use the internationally recognised Delphi method to garner opinions from a wide range of individuals with expertise in lifestyle weight management.

## 48 **INTRODUCTION**

49  
50 Both the National Institute for Health and Care Excellence (NICE)<sup>1</sup> and Scottish Intercollegiate  
51 Guidelines Network (SIGN)<sup>2</sup> guidelines outline the intervention components to be included in a  
52 community weight management programme, namely calorie restriction, increased physical activity,  
53 and behavioural interventions. These have proven efficacy from randomised controlled trials<sup>3</sup>.  
54  
55  
56  
57  
58  
59  
60

1  
2  
3 However, their implementation in practice is inconsistent with mapping exercises in Scotland<sup>4</sup> and  
4 England<sup>5</sup> showing wide variation in services in terms of inclusion criteria, referral routes, delivery  
5 format, length and cost. Few real life services have published data and when they do publish, results  
6 can be poor with low levels of completion and 'success', and lack of longer term outcomes.  
7  
8

9  
10 The NICE guidance, 'Weight management: lifestyle services for overweight or obese adults'<sup>1</sup>,  
11 identified a number of evidence gaps. These included, reliance on studies with short follow-up,  
12 collection of data at limited time points, small sample sizes, demographic samples that limit the  
13 ability to generalise, non-reporting of reasons for people dropping out and lack of evidence  
14 regarding the effect of population characteristics, such as age, gender and socio economic status, on  
15 the effectiveness of a service. They noted a lack of comparisons between lifestyle weight  
16 management programmes in the United Kingdom (UK). This lack of an evidence base means that it is  
17 not possible to issue clear guidance as to which services are cost effective for which population  
18 groups.  
19  
20  
21  
22  
23

24  
25 Public Health England (PHE) has created a standard evaluation framework (SEF)<sup>6</sup> to aid the  
26 evaluation of real world weight management programmes. However, in their 2015 weight  
27 management mapping exercise<sup>5</sup>, PHE reported that only 46% of adult weight management  
28 programmes use the SEF and, as it simply suggests areas for reporting and potential methods of  
29 analysis, there is a huge gap in standardised reporting. PHE had intended to analyse data from  
30 services but analysis was not possible due to the heterogeneity of reporting which included  
31 kilograms, % weight loss, average number of completers achieving 5% weight loss, body mass index  
32 (BMI) and more<sup>5</sup>. With regard to research studies, evidence suggests similar heterogeneity in terms  
33 of the reporting of outcomes<sup>7</sup>.  
34  
35  
36  
37  
38

39  
40 In an attempt to address this reporting issue, PHE issued a minimum dataset<sup>8</sup> which provides an  
41 important core outcome recommendation for England, stipulating collection of certain  
42 demographics, service details, BMI and wellbeing at baseline, on completion of the programme and  
43 at 6 months and 12 months post programme. A data collection tool provides information to support  
44 the standardisation of these data collection practices. This minimum dataset will be used to support  
45 PHE's recently released document on adult tier 2 weight management service key performance  
46 indicators (KPIs)<sup>9</sup> which provides advice as to how weight status and service compliance should be  
47 reported and measured.  
48  
49  
50  
51  
52

53 The study described herein, Developing Core Outcome Measures for Lifestyle Weight Management  
54 Programmes by Expert Consensus, has been funded through a Chief Scientist Office of the Scottish  
55  
56  
57  
58  
59

1  
2  
3 Government Health Department grant and will serve to further validate and build upon the PHE  
4 minimum dataset<sup>8</sup> and KPI document<sup>9</sup>, while also informing a similar framework for Scotland. In  
5 addition, our research will provide much needed consensus on the measurements that should be  
6 used, such as questionnaires, something currently not covered in the PHE minimum dataset<sup>8</sup> or KPI  
7 document<sup>9</sup>. Overall, this work will ensure more consistency in the measurement of the effectiveness  
8 of weight management services, leading to a better evidence base from which to identify which  
9 services are effective across a range of settings.  
10  
11

12  
13  
14 Therefore, the aim of this study, which will run from November 2017 until November 2018, is to gain  
15 expert consensus opinion on the core outcomes that should be reported from lifestyle weight  
16 management interventions in real world clinical practice as well as within research studies.  
17  
18

19  
20 The specific study objectives are to:

- 21  
22 1. Review the list of outcomes previously reported in the PHE SEF<sup>6</sup>, minimum dataset<sup>8</sup> and KPI  
23 document<sup>9</sup>;
- 24  
25 2. Identify additional outcomes reported in studies of structured, sustained, multi-component  
26 weight management programmes from a systematic review of the literature;
- 27  
28 3. Select outcomes for inclusion in the core dataset using consensus methodology;
- 29  
30 4. Select instruments for measuring chosen outcomes using consensus methodology.  
31  
32  
33  
34  
35  
36  
37

## 38 **METHODS AND ANALYSIS**

### 39 **Identification of outcomes**

40  
41  
42 We will generate a list of outcomes by review of the PHE SEF<sup>6</sup>, which was itself developed from a  
43 systematic review of the literature/focus groups, and from the PHE minimum dataset<sup>8</sup> and KPI  
44 document<sup>9</sup> which were developed through expert consensus and evidence from the peer review and  
45 grey literature.  
46  
47  
48

49  
50 Further outcomes will be selected by a review of included studies in the systematic review, 'The  
51 clinical effectiveness of long-term weight management schemes for adults' by Hartmann-Boyce *et al.*  
52 (2013)<sup>7</sup>, conducted during the development of NICE guidance<sup>1</sup>. This systematic review<sup>7</sup> assessed the  
53 effects of multicomponent behavioural weight management programmes (BWMPs) in overweight  
54 and adults with obesity which may be applicable in the UK. To be considered a multicomponent  
55  
56  
57  
58  
59  
60

1  
2  
3 BWMP, the components of the programme had to include diet, physical activity and behavioural  
4 therapy (for example, counselling sessions). The scope included commercial weight loss programmes  
5 and non-commercial programmes, such as those delivered in primary care settings (for example, in  
6 GP practices)<sup>7</sup>. It updated and expanded on an existing systematic review published in 2011 by  
7 Loveman *et al.*<sup>3</sup> and used similar methods. The Loveman systematic review<sup>3</sup> sought to assess the  
8 long-term clinical effectiveness and cost-effectiveness of multicomponent weight management  
9 schemes for adults in terms of weight loss and maintenance of weight loss.  
10  
11  
12  
13

14 Additional outcomes will be identified by updating the Hartmann-Boyce systematic review<sup>7</sup>, using  
15 the same inclusion criteria but extending search dates so that studies from 1/11/2012 until 30/09/17  
16 are included. Search and selection criteria for the systematic review are identical to those of  
17 Hartmann-Boyce<sup>7</sup>. With regard to database searches, Hartmann-Boyce<sup>7</sup> searched BIOSIS, the  
18 Cochrane Database of Systematic Reviews, CENTRAL, the Conference Proceedings Citation Index, the  
19 Database of Abstracts of Reviews and Effects (DARE), Embase, the Health Technology Assessment  
20 database, Medline, PsychInfo, and Science Citation Index for references relating to weight loss  
21 programmes. They also screened references from three additional sources: reference lists in  
22 systematic reviews, documents received via the NICE call for evidence, and studies excluded from  
23 Loveman<sup>3</sup> that they wished to re-examine. Studies selected for inclusion had to be structured  
24 sustained multi-component weight management programmes with interventions which were a  
25 combination of diet and physical activity with a behaviour change strategy to influence lifestyle. In  
26 addition, programmes were required to include a follow-up of more than 12 months and be  
27 delivered in the health sector, in the community or commercially (i.e. applicable to the NHS).  
28  
29  
30  
31  
32  
33  
34  
35  
36

37 Two review authors will independently assess the abstracts of studies resulting from our literature  
38 search. Full text copies of studies appearing to meet the inclusion criteria will be further  
39 independently assessed by the 2 reviewers. Following discussion, agreement will be reached as to  
40 which studies to include. Any new outcomes will then be identified from the selected studies from  
41 both Hartmann-Boyce<sup>7</sup> and the updated review.  
42  
43  
44  
45  
46  
47

#### 48 **Identification of Instruments**

49  
50  
51 By review of the studies identified during the systematic reviews previously described, we will list  
52 instruments and definitions for selected outcomes. The study investigators will review this list and  
53 add any further suitable instruments.  
54  
55  
56  
57  
58  
59  
60

## Data Analysis and Presentation

For analysis purposes, the data will be tabulated so that the outcomes and instruments to be included in our Delphi are listed and the study/studies from which they were identified are displayed. Outcomes and instruments will be grouped under appropriate domains following review of selected outcomes.

## Participants

We will develop our core outcome set by means of consensus from an expert group. The sampling frame will aim to include members of the public with experience of NHS, local authority or commercial weight management programmes in the U.K., academics/policy makers/commissioners working in weight management, staff currently involved in delivering a lifestyle weight management programme for adults (without significant policy involvement), and primary care staff (referrers). There is no published agreement on the optimal size of an expert group; pragmatism is required while ensuring a range of opinions is garnered. Experience suggests a greater than 80% completion rate of Delphi questionnaires<sup>10;11</sup>.

We will pre-approach potential volunteers to get agreement to participate from 10 members of the public, 20 academics/policy makers/commissioners, 20 weight management staff and 10 primary care staff. Forty experts will complete each of the two separate Delphi processes. For the first Delphi process (stage 1, outcome selection), 10 members of the public, 10 academics/policy makers/commissioners, 10 weight management staff and 10 primary care staff will be invited to participate. For the second Delphi (stage 2, instrument selection), 20 academics/policy makers/commissioners and 20 weight management staff will be invited to participate with further members recruited if any of the original group (the 10 from each group who completed stage 1) have dropped out after the stage 1 Delphi.

A small monetary incentive (a £35 gift voucher for either John Lewis or Amazon, depending on preference) will be offered to members of the public and primary care staff as this study is not of any direct benefit to them and could not be considered part of their role.



1  
2  
3 Staff working in weight management, academics/policy makers/commissioners and primary care  
4 staff will be recruited by email from the investigators and their personal contacts, and also via an  
5 email from the Association for the Study of Obesity. An information letter outlining the study will be  
6 attached to emails. On registering interest in our study, we will ask volunteers from these groups to  
7 provide us with information as to their role and geographical location within the UK.  
8  
9

10  
11 Members of the public will be recruited by email from the Association for the Study of Obesity  
12 (which has lay members) and from professional contacts (a number of weight management  
13 programmes have lay members on steering committees). An information letter outlining the study  
14 will be attached to emails. (The information letter for the public will be written in lay language and  
15 will therefore differ slightly to the information letter for the other groups.) We have also registered  
16 with the NIHR People in Research website (<https://www.peopleinresearch.org/>) where our study will  
17 be advertised. Our information letter will be available to download from this website. On registering  
18 interest in our study, a 'job description' pro forma will be sent to members of the public via email.  
19 They will be asked to complete this pro forma and return it to us by email. The pro forma will  
20 provide us with information as to their gender, age, geographical location and experience of weight  
21 loss programmes.  
22  
23  
24  
25  
26  
27  
28

29  
30 In addition, Facebook and Twitter will be used to recruit members of the public, weight  
31 management staff, academics/policy makers/commissioners and primary care staff. Facebook posts  
32 and Tweets will link to a Mailchimp recruitment page where volunteers will be able to register their  
33 interest. On doing so, they will receive the appropriate information letter. Weight management  
34 staff, academics/policy makers/commissioners and primary care staff will be asked to provide us  
35 with information as to their role and geographical location within the UK, and members of the public  
36 will be asked to complete the job description pro forma.  
37  
38  
39  
40

41  
42 Following provision of information regarding role and geographical location from weight  
43 management staff, academics/policy makers/commissioners and primary care staff, and the return  
44 of completed pro formas from members of the public, selection of volunteers to participate will  
45 commence. Selection will be based on our sampling framework which is outlined below. Volunteers  
46 will be sent an email to thank them for their interest and inform them if they have been selected to  
47 participate or not. A list of selected volunteers' names and email addresses will then be sent to  
48 Clinvivo ([www.clinvivo.com](http://www.clinvivo.com), a spin-out company of the University of Warwick) who will be  
49 conducting the Delphi process. Clinvivo will then contact these individuals by email, providing a link  
50 to the online Delphi questionnaire and instructions as to how to complete it.  
51  
52  
53  
54  
55  
56  
57  
58  
59  
60

## Sampling Framework

To ensure our volunteers are a representative UK group, of the 20 weight management staff selected, at least 50% will be from England. Similarly, at least 50% of the 20 academic/policy maker/commissioner group will be from England. 8 of the 20 (40%) will be academics, 6 of the 20 (30%) will be policy makers and 6 of the 20 (30%) will be commissioners. At least 50% of the 10 primary care staff selected will also be from England. With regard to members of the public, more than 50% will have experience of commercial weight loss programmes, more than 50% will be of working age, more than 30% will be male and less than 30% will be from any one region of the UK.

## Delphi Survey

In order to develop our core outcome dataset, Delphi methodology will be used to gain consensus from our expert group. Two Delphis (stage 1 and stage 2) will be carried out using an online system developed and conducted by Clinvivo. Each Delphi will be carried out online over three rounds (Figure 1).

The stage 1 Delphi will involve asking each expert to score the importance of an outcome measure for use in weight management service outcome reporting. The scale will run from 1-9 with 1-3 indicating that the outcome is unimportant, 4-6 indicating that it is neither unimportant nor important and 7-9 indicating that it is important.

During the stage 2 Delphi, experts will be asked to score the appropriateness of outcome definitions and instruments for measurement of outcomes. Again, this will be done using a 1-9 scale with 1-3 indicating that the definition/instrument is inappropriate, 4-6 indicating that it is neither appropriate nor inappropriate and 7-9 indicating that it is appropriate.

## Statistical Analysis

To assess disagreement and importance/appropriateness (and thus define consensus) the Research AND Development (RAND)/ University of California Los Angeles (UCLA) appropriateness method will be used<sup>10</sup>. This involves calculating the median score, the inter-percentile range (IPR, 30th and 70th), and the inter-percentile range adjusted for symmetry (IPRAS), for each item being rated.

1  
2  
3 Fitch *et al.*<sup>10</sup> first explored using the IPR alone in an attempt to develop a method that reproduced  
4 'classic' RAND definitions on panels that were multiples of 3 (which was typical in RAND's early  
5 consensus studies), but could also be extended to larger panel sizes. They found that in cases when  
6 agreement was good, the IPR should be narrow and in cases where there was disagreement, the IPR  
7 should be wide. However, an in-depth examination of the cases of disagreement identified by the  
8 IPR led to the discovery that when the ratings were symmetric, the IPR required to label an  
9 indication as disagreement was smaller than when the ratings were asymmetric, with respect to the  
10 middle. To overcome this, they developed the IPRAS which includes a correction factor for  
11 asymmetry (*Equation 1*).

12  
13  
14  
15  
16  
17  
18  
19  
20 *Equation 1*

21  
22 
$$IPRAS = IPRr + (AI \times CFA)$$

23  
24  
25 *Where IPRr is the inter-percentile range required for disagreement when perfect symmetry exists, AI*  
26 *is the asymmetry index, and CFA is the correction factor for asymmetry.*

27  
28  
29  
30  
31 The IPRAS is the threshold beyond which the IPR for a particular item indicates disagreement. Using  
32 the IPRAS and the IPR to judge disagreement reproduces 'classic' RAND definitions when applied to  
33 panels made up of multiples of 3, but can also be applied to panels of any size<sup>10</sup>. Variations on the  
34 stringencies of definitions of disagreement exist<sup>11</sup> but similar examples of Delphi studies in health  
35 services research have used the classic definition<sup>14;15</sup>. In *Equation 1*, the optimal values for IPRr and  
36 CFA were derived following empirical work on a 9-point scale<sup>10</sup>. Fitch *et al.* found that using values  
37 of 2.35 and 1.5 best reproduced the 'classic' definitions of agreement. These values will be used in  
38 this analysis. We will calculate AI as the distance between the central point of the IPR ( $p30+p70/2$ )  
39 and the central point of the scale (i.e. 5 on a 1-9 point scale.).

40  
41  
42  
43  
44  
45  
46 The IPRAS threshold is dependent on the symmetry of ratings about the median. Thus, each item  
47 requires a different IPRAS to be calculated. Consequently, the  $i^{\text{th}}$  indication is rated with  
48 disagreement if the  $IPR_i > IPRAS_i$ . In previous Delphi studies some have calculated the ratio of these:  
49 the disagreement index<sup>14;16</sup>. If the disagreement index was less than 1.0, it indicated there was no  
50 disagreement for the item in question. However, this is problematic in terms of interpretation  
51 because in the case that the IPR is zero, then the ratio is zero, which can cause confusion. For this  
52  
53  
54  
55  
56  
57  
58  
59  
60

1  
2  
3 reason we will present IPR and IPRAS values and simply comment on whether or not there is  
4 disagreement (i.e. when  $IPR_i > IPRAS_i$ ).  
5

6  
7 Judgement of appropriateness/importance also follows the classic RAND definitions, and this is  
8 assessed simply as whether the median rating falls between 1 to 3 (inappropriate/unimportant), 4  
9 and 6 (unsure), or 7 and 9 (appropriate/important).  
10

11  
12 At the end of each Delphi round, the median rating will be determined for individual  
13 outcomes/instruments and the distribution of ratings summarised in analysis conducted by Clinvivo  
14 and transferred to our research group (Figure 1).  
15

16  
17 During both stage 1 and stage 2, participants will be given 2 weeks to complete each round of the  
18 Delphi and will be reminded of the deadline for completion before starting the process. Participants  
19 will also be sent a reminder email 1 day before the deadline for each round.  
20  
21  
22  
23  
24  
25

#### 26 Stage 1, Round 1 Delphi

27  
28 The first Delphi study (stage 1) will be to select outcomes for inclusion in the core dataset. Full  
29 instructions will be provided to the expert group prior to completion of stage 1 questionnaires.  
30 Outcomes will be grouped under appropriate domains and full definitions of each outcome will be  
31 provided. Participants will be asked to rate each outcome in turn using the 1-9 scale. During round 1,  
32 there will be an option for adding free text outlining reasons for any given rating and also for  
33 suggesting possible additional outcomes.  
34  
35  
36  
37  
38  
39  
40

#### 41 Analysis of Stage 1, Round 1

42  
43 Additional outcomes listed by participants will be reviewed by two members of the study team  
44 (RMM and JL) to ensure they represent new outcomes. All outcomes, excluding any rated  
45 unimportant by consensus and including any new outcomes, will be carried forward to round 2.  
46  
47  
48  
49  
50

#### 51 Stage 1, Round 2 Delphi

52  
53 In round 2, all experts will be asked to rate outcomes again. They will be shown their previous rating,  
54 the median expert group rating and any free text comments in the hope of ratings reaching a  
55 consensus. Experts will be asked to strongly consider the priority outcomes for weight management  
56  
57  
58  
59  
60

1  
2  
3 reporting in this round. Additional questions will be added as to the appropriate number of items to  
4 be included in the core outcome set.  
5  
6  
7  
8  
9

#### 10 11 Analysis of Stage 1, Round 2 12

13 All outcomes, excluding any rated unimportant by consensus and including any new outcomes, will  
14 be carried forward to round 3.  
15  
16  
17  
18  
19

#### 20 Stage 1, Round 3 Delphi 21

22 In round 3, all experts will be asked to rate outcomes for the final time. They will be shown their  
23 previous rating, the median expert group rating and any free text comments in the hope of ratings  
24 reaching a consensus. Experts will be asked to strongly consider the priority outcomes for weight  
25 management reporting in this round.  
26  
27  
28  
29  
30  
31

#### 32 Analysis of Stage 1, Round 3 33

34 Using the consensus on the outcome set size and importance of outcomes, an outcome set will be  
35 developed by the study team using the results of the Delphi.  
36  
37  
38  
39  
40

#### 41 Stage 2, Round 1 Delphi 42

43 The second Delphi study (stage 2) will be for definition/instrument selection. Selection of  
44 instruments for inclusion in the stage 2 Delphi will be informed, as previously stated, by  
45 results/ratings/suggestions from stage 1, systematic review and input from co-investigators (LJE and  
46 SAS).  
47  
48  
49

50 Full instructions will be provided prior to completion of stage 2 questionnaires. As per stage 1,  
51 instruments will be grouped under appropriate domains and full definitions of each instrument will  
52 be provided. As stated, participants will be asked to rate each instrument in turn using a 1-9 scale of  
53 appropriateness (rather than importance). During the first round of the stage 2 instrument selection  
54  
55  
56  
57  
58  
59  
60

1  
2  
3 process , there will be an option for adding text outlining reasons for any given rating and also for  
4 suggesting possible additional instruments for measuring or defining outcomes.  
5  
6  
7  
8  
9  
10  
11  
12

#### 13 14 Analysis of Stage 2, Round 1

15  
16 Additional instruments listed by participants will be reviewed by two members of the study team  
17 (RMM and JL) to ensure they represent new instruments. All instruments, excluding those rated  
18 inappropriate by consensus and including any new instruments, will be carried forward to round 2.  
19  
20  
21  
22  
23

#### 24 Stage 2, Round 2 Delphi

25  
26 In round 2, all experts will be asked to rate instruments again. They will be shown their previous  
27 rating, the median expert group rating and any free text comments in the hope of ratings reaching a  
28 consensus. Experts will be encouraged to rate instruments in a way that shows their preferences.  
29  
30  
31  
32  
33

#### 34 Analysis of Stage 2, Round 2

35  
36 It may be that after round 2 an instrument set can be formed. Only those instruments related to an  
37 outcome for which there is no established consensus will be carried over to round 3.  
38  
39  
40  
41  
42

#### 43 Stage 2, Round 3 Delphi

44  
45 In round 3, all experts will be asked to select instruments for the final time. They will be shown their  
46 previous rating, the median expert group rating and any free text comments in the hope of ratings  
47 reaching a consensus. In this round they will be asked to select the most appropriate instrument for  
48 each outcome in a binary format.  
49  
50  
51  
52  
53

#### 54 Analysis of Stage 2, Round 3

1  
2  
3 A final instrument set matched to the core outcome set will be formed based on the consensus. In  
4 any areas where there is no consensus, the study team will adjudicate, taking account of free text  
5 comments.  
6  
7  
8  
9  
10  
11  
12  
13  
14

#### 15 Data Storage

16  
17 Participants' contact details, including email addresses and telephone numbers, and the answers  
18 they provide, will only be stored by Clinvivo for the duration of the study. Clinvivo will not share  
19 participants' contact details with any third parties and participants' answers will be stored  
20 anonymously. Data will be encrypted before being stored on Clinvivo's server and prior to being  
21 transferred to the University of Glasgow. On completion of the study, Clinvivo will destroy all data  
22 after transferring it to the University of Glasgow. The University will securely store the data on  
23 password access computers for a period of ten years following completion of the research project.  
24  
25  
26  
27  
28  
29  
30  
31  
32  
33

#### 34 Ethics and dissemination

35  
36 Ethical approval for this study has been received from the University of Glasgow College of Medical,  
37 Veterinary and Life Sciences Ethics Committee. With regard to disseminating the results of our study,  
38 we will submit a report to our funding body, the Chief Scientist Office of the Scottish Government  
39 Health Department, and share early findings with PHE and Health Scotland. In addition, we hope to  
40 communicate our results via conference presentations, peer review publication and also via our  
41 institution's social media platforms.  
42  
43  
44  
45  
46  
47  
48  
49  
50  
51  
52  
53  
54  
55  
56  
57  
58  
59  
60

## References

- (1) National Institute for Health and Care Excellence. Weight Management: lifestyle services for overweight or obese adults (PH53). 2014.
- (2) Scottish Intercollegiate Guidelines Network. Management of Obesity: A national clinical guideline. 2010.
- (3) Loveman E, Frampton GK, Shepherd J, Picot J, Cooper K, Bryant J et al. The clinical effectiveness and cost-effectiveness of long-term weight management schemes for adults: a systematic review. *Health Technol Assess* 2011; 15(2):1-182.
- (4) Read S, Logue J. Variations in weight management services in Scotland: a national survey of weight management provision. *J Public Health (Oxf)* 2016; 38(3):e325-e335.
- (5) Public Health England. National mapping of weight management services 2015.
- (6) Public Health England. Standard Evaluation Framework for weight management interventions. 2009.
- (7) Hartmann-Boyce J, Johns D, Aveyard P, Lewis A, Jebb S, Phillips D et al. Managing overweight and obese adults: The clinical effectiveness of long-term weight management schemes for adults. 2013.
- (8) <https://www.gov.uk/government/publications/adult-weight-management-services-collect-and-record-data>. Accessed 2017.
- (9) <https://www.gov.uk/government/publications/adult-weight-management-key-performance-indicators>. Accessed 2017.



- 1  
2  
3 (10) Fitch K, Bernstein SJ, Aguilar DM, Burnand B, LaCalle JR, Lazaro P et al. The RAND/UCLA  
4 Appropriateness Method User's Manual. 2001. RAND, Santa Monica.  
5  
6  
7 (11) Park RE, Fink A, Brook RH, Chassin MR, Kahn KL, Merrick NJ et al. Physician ratings of  
8 appropriate indications for six medical and surgical procedures. *Am J Public Health* 1986;  
9 76(7):766-772.  
10  
11  
12  
13  
14  
15  
16  
17

### 18 **Authors' contributions**

19  
20 RMM and JL drafted the protocol. LJE and SAS critically reviewed the protocol. RMM and JL finalised  
21 the protocol.  
22  
23  
24  
25  
26  
27  
28

### 29 **Funding Statement**

30  
31 This work was supported by the Chief Scientist Office of the Scottish Government Health  
32 Department, grant reference number CGA/17/08.  
33  
34

35 SAS was supported by a MRC Strategic Award (MC-PC-13027, MC\_UU\_12017\_14 and SPHSU14).  
36  
37  
38  
39  
40  
41  
42

### 43 **Competing interests statement**

44 JL leads a joint working project between University of Glasgow, NHS Greater Glasgow and Clyde,  
45 MSD and Astra Zeneca. The project also involved an educational grant from Janssen. JL received  
46 funding to attend a conference from Novo Nordisk.  
47  
48

49 LJE has a part time secondment with PHE.  
50  
51  
52  
53  
54  
55  
56  
57  
58  
59  
60

### Figure Legends

**Figure 1. Schematic outlining the two stage Delphi study.** In order to develop a core outcome set and definition/instrument set, Delphi methodology will be used to gain consensus from expert groups. Two Delphis (stage 1 and stage 2) will be carried out online over three rounds of questionnaires. The stage 1 Delphi will focus on development of a core outcome set. The stage 2 Delphi will focus on corresponding definition/instrument selection. PHE, Public Health England; SEF, standard evaluation framework; KPI, key performance indicator.

For peer review only

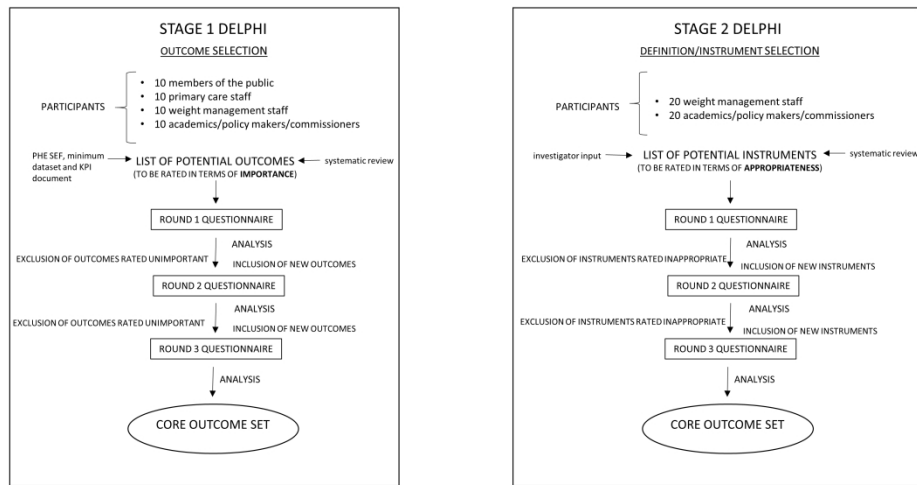

Figure 1. Schematic outlining the two stage Delphi study. In order to develop a core outcome set and definition/instrument set, Delphi methodology will be used to gain consensus from expert groups. Two Delphis (stage 1 and stage 2) will be carried out online over three rounds of questionnaires. The stage 1 Delphi will focus on development of a core outcome set. The stage 2 Delphi will focus on corresponding definition/instrument selection. PHE, Public Health England; SEF, standard evaluation framework; KPI, key performance indicator.

338x190mm (300 x 300 DPI)

# BMJ Open

## Development of a core outcome set for behavioural weight management programmes for adults with overweight and obesity: protocol for obtaining expert consensus using Delphi methodology

|                                 |                                                                                                                                                                                                                                                                                                                                                       |
|---------------------------------|-------------------------------------------------------------------------------------------------------------------------------------------------------------------------------------------------------------------------------------------------------------------------------------------------------------------------------------------------------|
| Journal:                        | <i>BMJ Open</i>                                                                                                                                                                                                                                                                                                                                       |
| Manuscript ID                   | bmjopen-2018-025193.R1                                                                                                                                                                                                                                                                                                                                |
| Article Type:                   | Protocol                                                                                                                                                                                                                                                                                                                                              |
| Date Submitted by the Author:   | 25-Oct-2018                                                                                                                                                                                                                                                                                                                                           |
| Complete List of Authors:       | Mackenzie, Ruth; University of Glasgow, Institute of Cardiovascular and Medical Sciences<br>Ells, Louisa; Teeside University, School of Health and social Care<br>Simpson, Sharon; University of Glasgow, MRC/CSO Social and Public Health Sciences Unit<br>Logue, Jennifer; University of Glasgow, Institute of Cardiovascular and Medical Sciences; |
| <b>Primary Subject Heading</b>: | Public health                                                                                                                                                                                                                                                                                                                                         |
| Secondary Subject Heading:      | Health policy                                                                                                                                                                                                                                                                                                                                         |
| Keywords:                       | core outcomes, lifestyle weight management, Delphi                                                                                                                                                                                                                                                                                                    |
|                                 |                                                                                                                                                                                                                                                                                                                                                       |

SCHOLARONE™  
Manuscripts

1  
2  
3 1 **Development of a core outcome set for behavioural weight management programmes for adults with**  
4 **overweight and obesity: protocol for obtaining expert consensus using Delphi methodology**

5 2  
6  
7 3 *Ruth M. Mackenzie<sup>1</sup>, Louisa J. Ells<sup>2</sup>, Sharon Anne Simpson<sup>3</sup>, Jennifer Logue<sup>1</sup>*  
8

9  
10 4 <sup>1</sup> Institute of Cardiovascular and Medical Sciences, University of Glasgow  
11

12 5 <sup>2</sup> School of Health & Social Care, Teeside University  
13

14 6 <sup>3</sup> Institute of Health and Wellbeing, University of Glasgow  
15  
16

17 7  
18  
19  
20 8 Corresponding Author:

21  
22 9 Jennifer Logue  
23

24  
25 10 Institute of Cardiovascular and Medical Sciences  
26

27 11 University of Glasgow  
28

29  
30 12 126 University Place  
31

32 13 Glasgow  
33

34  
35 14 G12 8TA  
36

37 15 [Jennifer.Logue@glasgow.ac.uk](mailto:Jennifer.Logue@glasgow.ac.uk)  
38  
39

40 16  
41

42 17 **ABSTRACT**  
43  
44

45 18 **Introduction:** Weight management interventions in research studies and in clinical practice differ in  
46 19 length, advice, frequency of meetings, staff, and cost. Very few real-world programmes have published  
47 20 patient-related outcomes, and those that have published used different ways of reporting the  
48 21 information, making it impossible to compare interventions and further develop the evidence base.  
49 22 Developing a core outcome set for behavioural weight management programmes (BWMPs) for adults  
50 23 with overweight and obesity will allow different BWMPs to be compared and reveal which interventions  
51 24 work best for which members of the population.  
52  
53  
54  
55  
56  
57  
58  
59  
60

1  
2  
3 25 **Methods and analysis:** An expert group, comprised of 40 people who work in, refer to, or attend BWMPs  
4  
5 26 for adults with overweight and obesity, will be asked to decide which outcomes services should report.  
6  
7 27 An online Delphi process will be employed to help the group reach consensus as to which outcomes should  
8  
9 28 be measured and reported, and which definitions/instruments should be utilised in order to do so. The  
10  
11 29 first stage of the Delphi process (3 rounds of questionnaires) will focus on outcomes while the second  
12  
13 30 stage (3 additional rounds of questionnaires) will focus on definition/instrument selection.

14 31 **Ethics and dissemination:** Ethical approval for this study has been received from the University of Glasgow  
15  
16 32 College of Medical, Veterinary and Life Sciences Ethics Committee. With regard to disseminating results,  
17  
18 33 a report will be submitted to our funding body, the Chief Scientist Office of the Scottish Government  
19  
20 34 Health Department. In addition, early findings will be shared with Public Health England (PHE) and Health  
21  
22 35 Scotland, and results communicated via conference presentations, peer review publication and our  
23  
24 36 institutions' social media platforms.

25 37 **Registration details:** The project has been registered with the COMET (Core Outcome Measures in  
26  
27 38 Effectiveness Trials) Initiative (<http://www.comet-initiative.org/studies/details/1056>).

## 29 39

### 31 40 **STRENGTHS AND LIMITATIONS OF THIS STUDY**

- 34 41 • The major strength of this study is that it is the first of its kind and development of a core outcome  
35 42 set for BWMPs for adults with overweight and obesity is much needed in order to standardise  
36 43 reporting which, in turn, will lead to a better evidence base and improvements in weight  
37 44 management provision.
- 41 45 • It is a limitation that this study is wholly based in the United Kingdom (UK) as the results may need  
42 46 some adaptation to be suited to real-world programmes set within other healthcare systems.
- 44 47 • However, we will use the internationally recognised Delphi method to garner opinions from a  
45 48 wide range of individuals with expertise in behavioural weight management.

1  
2  
3 52  
4  
5  
6 53  
78 54 **INTRODUCTION**  
9

10 55 Both the National Institute for Health and Care Excellence (NICE)<sup>1</sup> and Scottish Intercollegiate Guidelines  
11 56 Network (SIGN)<sup>2</sup> guidelines outline the intervention components to be included in a community weight  
12 57 management programme, namely calorie restriction, increased physical activity, and behavioural  
13 58 interventions. These have proven efficacy from randomised controlled trials<sup>3</sup>. However, their  
14 59 implementation in practice is inconsistent with mapping exercises in Scotland<sup>4</sup> and England<sup>5</sup> showing wide  
15 60 variation in services in terms of inclusion criteria, referral routes, delivery format, length and cost. Few  
16 61 real life services have published data and when they do publish, results can be poor with low levels of  
17 62 completion and 'success', and lack of longer term outcomes.

18 63 The NICE guidance, 'Weight management: lifestyle services for overweight or obese adults'<sup>1</sup>, identified a  
19 64 number of evidence gaps. These included, reliance on studies with short follow-up, collection of data at  
20 65 limited time points, small sample sizes, demographic samples that limit the ability to generalise, non-  
21 66 reporting of reasons for people dropping out and lack of evidence regarding the effect of population  
22 67 characteristics, such as age, gender and socio economic status, on the effectiveness of a service. They  
23 68 noted a lack of comparisons between behavioural weight management programmes (BWMPs) in the  
24 69 United Kingdom (UK). This lack of an evidence base means that it is not possible to issue clear guidance  
25 70 as to which services are cost effective for which population groups.

26 71 Public Health England (PHE) has created a standard evaluation framework (SEF)<sup>6</sup> to aid the evaluation of  
27 72 real world weight management programmes. However, in their 2015 weight management mapping  
28 73 exercise<sup>5</sup>, PHE reported that only 46% of adult weight management programmes use the SEF and, as it  
29 74 simply suggests areas for reporting and potential methods of analysis, there is a huge gap in standardised  
30 75 reporting. PHE had intended to analyse data from services but analysis was not possible due to the  
31 76 heterogeneity of reporting which included kilograms, % weight loss, average number of completers  
32 77 achieving 5% weight loss, body mass index (BMI) and more<sup>5</sup>. With regard to research studies, evidence  
33 78 suggests similar heterogeneity in terms of the reporting of outcomes<sup>7</sup>.

34 79 In an attempt to address this reporting issue, PHE issued a minimum dataset<sup>8</sup> which provides an important  
35 80 core outcome recommendation for England, stipulating collection of certain demographics, service

1  
2  
3 81 details, BMI and wellbeing at baseline, on completion of the programme and at 6 months and 12 months  
4  
5 82 post programme. A data collection tool provides information to support the standardisation of these data  
6  
7 83 collection practices. This minimum dataset will be used to support PHE's recently released document on  
8  
9 84 adult tier 2 weight management service key performance indicators (KPIs)<sup>9</sup> which provides advice as to  
10  
11 85 how weight status and service compliance should be reported and measured.

12  
13 86 The study described herein has been funded through a Chief Scientist Office of the Scottish Government  
14  
15 87 Health Department grant and will serve to further validate and build upon the PHE minimum dataset<sup>8</sup> and  
16  
17 88 KPI document<sup>9</sup>, while also informing a similar framework for Scotland. In addition, our research will  
18  
19 89 provide much needed consensus on the measurements that should be used, such as questionnaires,  
20  
21 90 something currently not covered in the PHE minimum dataset<sup>8</sup> or KPI document<sup>9</sup>. Overall, this work will  
22  
23 91 ensure more consistency in the measurement of the effectiveness of adult weight management services,  
24  
25 92 leading to a better evidence base from which to identify which services are effective across a range of  
26  
27 93 settings.

28  
29 94 Recently, a core outcome set for bariatric and metabolic surgery was successfully developed using  
30  
31 95 consensus methodology<sup>10</sup>. However, outcomes, including perioperative outcomes and post-operative  
32  
33 96 complications, are not relevant for reporting from BWMPs. Therefore, the aim of this study, which will  
34  
35 97 run from November 2017 until November 2018, is to gain expert consensus opinion on the core outcomes  
36  
37 98 that should be reported from behavioural weight management interventions for adults with overweight  
38  
39 99 and obesity in real world clinical practice as well as within research studies.

40  
41 100 The specific study objectives are to:

- 42 101 1. Review the list of outcomes previously reported in the PHE SEF<sup>6</sup>, minimum dataset<sup>8</sup> and KPI document<sup>9</sup>;
- 43 102 2. Identify additional outcomes reported in studies of structured, sustained, multi-component weight
- 44 103 management programmes for adults from a systematic review of the literature;
- 45 104 3. Select outcomes for inclusion in the core dataset using consensus methodology;
- 46 105 4. Select definitions/instruments for measuring chosen outcomes using consensus methodology.

47 106

48 107



108

109

110

## 111 METHODS AND ANALYSIS

### 112 Identification of outcomes

113 We will generate a list of outcomes by review of the PHE SEF<sup>6</sup>, which was itself developed from a  
114 systematic review of the literature/focus groups, and from the PHE minimum dataset<sup>8</sup> and KPI document<sup>9</sup>  
115 which were developed through expert consensus and evidence from the peer review and grey literature.

116 Further outcomes will be selected by a review of included studies in the systematic review, 'The clinical  
117 effectiveness of long-term weight management schemes for adults' by Hartmann-Boyce *et al.* (2013)<sup>7</sup>,  
118 conducted during the development of NICE guidance<sup>1</sup>. This systematic review<sup>7</sup> assessed the effects of  
119 multicomponent BWMPs in overweight and adults with obesity which may be applicable in the UK. To be  
120 considered a multicomponent BWMP, the components of the programme had to include diet, physical  
121 activity and behavioural therapy (for example, counselling sessions). The scope included commercial  
122 weight loss programmes and non-commercial programmes, such as those delivered in primary care  
123 settings (for example, in GP practices)<sup>7</sup>. It updated and expanded on an existing systematic review  
124 published in 2011 by Loveman *et al.*<sup>3</sup> and used similar methods. The Loveman systematic review<sup>3</sup> sought  
125 to assess the long-term clinical effectiveness and cost-effectiveness of  
126 multicomponent weight management schemes for adults in terms of weight loss and maintenance of  
127 weight loss.

128 Additional outcomes will be identified by updating the Hartmann-Boyce systematic review<sup>7</sup>, using the  
129 same inclusion criteria but extending search dates so that studies from 1/11/2012 until 30/09/17 are  
130 included. Search and selection criteria for the systematic review are identical to those of Hartmann-  
131 Boyce<sup>7</sup>. With regard to database searches, Hartmann-Boyce<sup>7</sup> searched BIOSIS, the Cochrane Database of  
132 Systematic Reviews, CENTRAL, the Conference Proceedings Citation Index, the Database of Abstracts of  
133 Reviews and Effects (DARE), Embase, the Health Technology Assessment database, Medline, PsychInfo,  
134 and Science Citation Index for references relating to weight loss programmes. They also screened  
135 references from three additional sources: reference lists in systematic reviews, documents received via  
136 the NICE call for evidence, and studies excluded from Loveman<sup>3</sup> that they wished to re-examine. Studies

1  
2  
3 137 selected for inclusion had to be structured, sustained, multi-component adult weight management  
4  
5 138 programmes with interventions which were a combination of diet and physical activity with a behaviour  
6  
7 139 change strategy to influence lifestyle. In addition, programmes were required to include a follow-up of  
8  
9 140 more than 12 months and be delivered in the health sector, in the community or commercially (i.e.  
10  
11 141 applicable to the NHS).

12 142 Two review authors will independently assess the abstracts of studies resulting from our literature search.  
13  
14 143 Full text copies of studies appearing to meet the inclusion criteria will be further independently assessed  
15  
16 144 by the 2 reviewers. Following discussion, agreement will be reached as to which studies to include. Any  
17  
18 145 new outcomes will then be identified from the selected studies from both Hartmann-Boyce<sup>7</sup> and the  
19  
20 146 updated review.

21  
22 147

#### 23 24 148 **Identification of Instruments**

25  
26 149 By review of the studies identified during the systematic reviews previously described, we will list  
27  
28 150 instruments and definitions for selected outcomes. The study investigators will review this list and add  
29  
30 151 any further suitable instruments.

31  
32 152

#### 33 34 35 153 **Data Analysis and Presentation**

36  
37 154 For analysis purposes, the data will be tabulated so that the outcomes and instruments to be included in  
38  
39 155 our Delphi are listed and the study/studies from which they were identified are displayed. Outcomes and  
40  
41 156 instruments will be grouped under appropriate domains following review of selected outcomes.

42  
43 157

#### 44 45 46 158 **Patient and Public Involvement**

47  
48 159 We will develop our core outcome set by means of consensus from an expert group. The sampling frame  
49  
50 160 will aim to include members of the public with experience of NHS, local authority or commercial adult  
51  
52 161 BWMPs in the UK, academics/policy makers/commissioners working in weight management, staff  
53  
54 162 currently involved in delivering a BWMP for adults (without significant policy involvement), and primary

1  
2  
3 163 care staff (referrers). Consensus methodology will ensure that the opinions and preferences of members  
4  
5 164 of the public will be given the same weighting as those of the other experts.  
6

7 165 There is no published agreement on the optimal size of an expert group; pragmatism is required while  
8  
9 166 ensuring a range of opinions is garnered. Experience suggests a greater than 80% completion rate of  
10  
11 167 Delphi questionnaires<sup>10,11</sup>. We will pre-approach potential volunteers to get agreement to participate  
12  
13 168 from 10 members of the public, 20 academics/policy makers/commissioners, 20 weight management staff  
14  
15 169 and 10 primary care staff. Forty experts will complete each of the two separate Delphi processes.

16  
17 170 For the first Delphi process (stage 1, outcome selection), 10 members of the public, 10 academics/policy  
18  
19 171 makers/commissioners, 10 weight management staff and 10 primary care staff will be invited to  
20  
21 172 participate.

22  
23 173 For the second Delphi (stage 2, instrument selection), 20 academics/policy makers/commissioners and 20  
24  
25 174 weight management staff will be invited to participate with further members recruited if any of the  
26  
27 175 original group (the 10 from each group who completed stage 1) have dropped out after the stage 1 Delphi.  
28  
29 176 The stage 2 Delphi will involve reading papers, looking at metrics and assessing validity of  
30  
31 177 instruments/questionnaires. With such a level of knowledge and expertise required, members of the  
32  
33 178 public and primary care staff will not be involved in this stage of the Delphi process.

34  
35 179 A small monetary incentive (a £35 gift voucher for either John Lewis or Amazon, depending on preference)  
36  
37 180 will be offered to members of the public and primary care staff as this study is not of any direct benefit to  
38  
39 181 them and could not be considered part of their role.

40  
41 182 Staff working in weight management, academics/policy makers/commissioners and primary care staff will  
42  
43 183 be recruited by email from the investigators and their personal contacts, and also via an email from the  
44  
45 184 Association for the Study of Obesity. An information letter outlining the study will be attached to emails.  
46  
47 185 On registering interest in our study, we will ask volunteers from these groups to provide us with  
48  
49 186 information as to their role and geographical location within the UK.

50  
51 187 Members of the public will be recruited by email from the Association for the Study of Obesity (which has  
52  
53 188 lay members) and from professional contacts (a number of weight management programmes have lay  
54  
55 189 members on steering committees). An information letter outlining the study will be attached to emails.  
56  
57 190 (The information letter for the public will be written in lay language and will therefore differ slightly to the  
58  
59 191 information letter for the other groups.) We have also registered with the NIHR People in Research

1  
2  
3 192 website (<https://www.peopleinresearch.org/>) where our study will be advertised (following review to  
4  
5 193 ensure suitability for a lay audience). Our information letter will be available to download from this  
6  
7 194 website. On registering interest in our study, a 'job description' pro forma will be sent to members of the  
8  
9 195 public via email. They will be asked to complete this pro forma and return it to us by email. The pro forma  
10 196 will provide us with information as to their gender, age, geographical location and experience of BWMPs.

11  
12 197 In addition, Facebook and Twitter will be used to recruit members of the public, weight management staff,  
13  
14 198 academics/policy makers/commissioners and primary care staff. Facebook posts and Tweets will link to a  
15  
16 199 Mailchimp recruitment page where volunteers will be able to register their interest. On doing so, they will  
17  
18 200 receive the appropriate information letter. Weight management staff, academics/policy  
19 201 makers/commissioners and primary care staff will be asked to provide us with information as to their role  
20  
21 202 and geographical location within the UK, and members of the public will be asked to complete the job  
22  
23 203 description pro forma.

24  
25 204 Following provision of information regarding role and geographical location from weight management  
26  
27 205 staff, academics/policy makers/commissioners and primary care staff, and the return of completed pro  
28  
29 206 formas from members of the public, selection of volunteers to participate will commence. Selection will  
30  
31 207 be based on our sampling framework which is outlined below. Volunteers will be sent an email to thank  
32  
33 208 them for their interest and inform them if they have been selected to participate or not. A list of selected  
34  
35 209 volunteers' names and email addresses will then be sent to Clinvivo ([www.clinvivo.com](http://www.clinvivo.com), a spin-out  
36  
37 210 company of the University of Warwick) who will be conducting the Delphi process. Clinvivo will then  
38  
39 211 contact these individuals by email, providing a link to the online Delphi questionnaire and instructions as  
40  
41 212 to how to complete it.

42  
43 213 On completion of the study, all participants (including members of the public) will be sent (by email) a  
44  
45 214 copy of the final outcome and definition/instrument sets. In addition, where consent has been given,  
46  
47 215 participants (including members of the public) will be named as contributors in the results publication.

48  
49 216

#### 50 217 Sampling Framework

51  
52 218 To ensure our volunteers are a representative UK group, of the 20 weight management staff selected, at  
53  
54 219 least 50% will be from England. Similarly, at least 50% of the 20 academic/policy maker/commissioner  
55  
56 220 group will be from England. 8 of the 20 (40%) will be academics, 6 of the 20 (30%) will be policy makers

1  
2  
3 221 and 6 of the 20 (30%) will be commissioners. At least 50% of the 10 primary care staff selected will also  
4  
5 222 be from England. With regard to members of the public, more than 50% will have experience of  
6  
7 223 commercial BWMPs, more than 50% will be of working age, more than 30% will be male and less than  
8  
9 224 30% will be from any one region of the UK.

10  
11 225

## 12 13 226 **Delphi Survey**

14  
15  
16 227 In order to develop our core outcome dataset, Delphi methodology will be used to gain consensus from  
17  
18 228 our expert group. Two Delphis (stage 1 and stage 2) will be carried out using an online system developed  
19  
20 229 and conducted by Clinvivo. Each Delphi will be carried out online over three sequential rounds with the  
21  
22 230 same group of participants (Figure 1). For both stage 1 and stage 2 Delphis, only those who complete a  
23  
24 231 questionnaire in round 1 will be eligible to participate in round 2, and only those who complete round 2  
25  
26 232 will be eligible to participate in round 3.

27 233 The stage 1 Delphi will involve asking each expert to score the importance of an outcome measure for use  
28  
29 234 in weight management service outcome reporting. The scale will run from 1-9 with 1-3 indicating that the  
30  
31 235 outcome is unimportant, 4-6 indicating that it is neither unimportant nor important and 7-9 indicating  
32  
33 236 that it is important.

34 237 During the stage 2 Delphi, experts will be asked to score the appropriateness of outcome definitions and  
35  
36 238 instruments for measurement of outcomes. Again, this will be done using a 1-9 scale with 1-3 indicating  
37  
38 239 that the definition/instrument is inappropriate, 4-6 indicating that it is neither appropriate nor  
39  
40 240 inappropriate and 7-9 indicating that it is appropriate.

41  
42 241

## 43 44 242 **Statistical Analysis**

45  
46  
47 243 To assess disagreement and importance/appropriateness (and thus define consensus) the Research AND  
48  
49 244 Development (RAND)/ University of California Los Angeles (UCLA) appropriateness method will be used<sup>11</sup>.  
50  
51 245 This involves calculating the median score, the inter-percentile range (IPR, 30th and 70th), and the inter-  
52  
53 246 percentile range adjusted for symmetry (IPRAS), for each item being rated.

54 247 Fitch *et al.*<sup>11</sup> first explored using the IPR alone in an attempt to develop a method that reproduced 'classic'  
55  
56 248 RAND definitions on panels that were multiples of 3 (which was typical in RAND's early consensus studies),  
57  
58  
59  
60

1  
2  
3 249 but could also be extended to larger panel sizes. They found that in cases when agreement was good, the  
4  
5 250 IPR should be narrow and in cases where there was disagreement, the IPR should be wide. However, an  
6  
7 251 in-depth examination of the cases of disagreement identified by the IPR led to the discovery that when  
8  
9 252 the ratings were symmetric, the IPR required to label an indication as disagreement was smaller than  
10  
11 253 when the ratings were asymmetric, with respect to the middle. To overcome this, they developed the  
12  
13 254 IPRAS which includes a correction factor for asymmetry (*Equation 1*).

14 255 *Equation 1*

15  
16 256 
$$IPRAS = IPRr + (AI \times CFA)$$

17  
18  
19 257 *Where IPRr is the inter-percentile range required for disagreement when perfect symmetry exists, AI is the*  
20  
21 258 *asymmetry index, and CFA is the correction factor for asymmetry.*

22  
23 259  
24  
25  
26 260 The IPRAS is the threshold beyond which the IPR for a particular item indicates disagreement. Using the  
27  
28 261 IPRAS and the IPR to judge disagreement reproduces 'classic' RAND definitions when applied to panels  
29  
30 262 made up of multiples of 3, but can also be applied to panels of any size<sup>11</sup>. Variations on the stringencies  
31  
32 263 of definitions of disagreement exist<sup>12</sup> but similar examples of Delphi studies in health services research  
33  
34 264 have used the classic definition<sup>13-18</sup>. In *Equation 1*, the optimal values for IPRr and CFA were derived  
35  
36 265 following empirical work on a 9-point scale<sup>11</sup>. Fitch *et al.* found that using values of 2.35 and 1.5 best  
37  
38 266 reproduced the 'classic' definitions of agreement. These values will be used in this analysis. We will  
39  
40 267 calculate AI as the distance between the central point of the IPR ( $p_{30}+p_{70}/2$ ) and the central point of the  
41  
42 268 scale (i.e. 5 on a 1-9 point scale.).

43  
44 269 The IPRAS threshold is dependent on the symmetry of ratings about the median. Thus, each item requires  
45  
46 270 a different IPRAS to be calculated. Consequently, the  $i^{\text{th}}$  indication is rated with disagreement if the  $IPR_i >$   
47  
48 271  $IPRAS_i$ . In previous Delphi studies some have calculated the ratio of these: the disagreement index<sup>14;16;18</sup>.  
49  
50 272 If the disagreement index was less than 1.0, it indicated there was no disagreement for the item in  
51  
52 273 question. However, this is problematic in terms of interpretation because in the case that the IPR is zero,  
53  
54 274 then the ratio is zero, which can cause confusion. For this reason we will present IPR and IPRAS values and  
55  
56 275 simply comment on whether or not there is disagreement (i.e. when  $IPR_i > IPRAS_i$ ).

1  
2  
3 276 Judgement of appropriateness/importance also follows the classic RAND definitions, and this is assessed  
4  
5 277 simply as whether the median rating falls between 1 to 3 (inappropriate/unimportant), 4 and 6 (unsure),  
6  
7 278 or 7 and 9 (appropriate/important).

8  
9 279 At the end of each Delphi round, the median rating will be determined for individual  
10  
11 280 outcomes/instruments and the distribution of ratings summarised in analysis conducted by Clinvivo and  
12  
13 281 transferred to our research group (Figure 1).

14  
15 282 During both stage 1 and stage 2, participants will be given 2 weeks to complete each round of the Delphi  
16  
17 283 and will be reminded of the deadline for completion before starting the process. Participants will also be  
18  
19 284 sent a reminder email 1 day before the deadline for each round.

20  
21 285

#### 22 23 286 Stage 1, Round 1 Delphi

24  
25  
26 287 The first Delphi study (stage 1) will be to select outcomes for inclusion in the core dataset. Full instructions  
27  
28 288 will be provided to the expert group prior to completion of stage 1 questionnaires. Outcomes will be  
29  
30 289 grouped under appropriate domains (broadly based on the PHE SEF<sup>6</sup> and broadly following the weight  
31  
32 290 management chronological pathway) and full definitions of each domain and outcome will be provided in  
33  
34 291 lay language. Participants will be asked to rate each outcome in turn using the 1-9 scale. During round 1,  
35  
36 292 there will be an option for adding free text outlining reasons for any given rating and also for suggesting  
37  
38 293 possible additional outcomes.

39 294

#### 40 41 295 Analysis of Stage 1, Round 1

42  
43 296 Additional outcomes listed by participants will be reviewed by two members of the study team (RMM and  
44  
45 297 JL) to ensure they represent new outcomes. All outcomes, excluding any rated unimportant by consensus  
46  
47 298 and including any new outcomes, will be carried forward to round 2.

48  
49 299

#### 50 51 52 300 Stage 1, Round 2 Delphi

53  
54 301 In round 2, all experts will be asked to rate outcomes again. They will be shown their previous rating, the  
55  
56 302 median expert group rating and any free text comments in the hope of ratings reaching a consensus.

1  
2  
3 303 Experts will be asked to strongly consider the priority outcomes for weight management reporting in this  
4 304 round. Additional questions will be added as to the appropriate number of items to be included in the  
5 305 core outcome set.  
6  
7

8  
9 306

10  
11 307 Analysis of Stage 1, Round 2

12  
13  
14 308 All outcomes, excluding any rated unimportant by consensus and including any new outcomes, will be  
15 309 carried forward to round 3.  
16

17  
18 310

19  
20  
21 311 Stage 1, Round 3 Delphi

22  
23 312 In round 3, all experts will be asked to rate outcomes for the final time. They will be shown their previous  
24 313 rating, the median expert group rating and any free text comments in the hope of ratings reaching a  
25 314 consensus. Should it be the case that a large number of outcomes are being rated as important at this  
26 315 stage, the need to decide which outcomes should take priority for weight management reporting will be  
27 316 reinforced to experts and they will be asked to rate only these priority outcomes as important. This will  
28 317 ensure development of a core outcome set of a manageable/practical size.  
29

30  
31  
32 318 Analysis of Stage 1, Round 3

33  
34  
35 319 Using the consensus on the outcome set size and importance of outcomes, an outcome set will be  
36 320 developed by the study team using the results of the Delphi.  
37

38  
39  
40 321

41  
42  
43 322 Stage 2, Round 1 Delphi

44  
45  
46 323 The second Delphi study (stage 2) will be for definition/instrument selection. Selection of instruments for  
47 324 inclusion in the stage 2 Delphi will be informed, as previously stated, by results/ratings/suggestions from  
48 325 stage 1, systematic review and input from co-investigators (LJE and SAS).  
49

50  
51  
52 326 Full instructions will be provided prior to completion of stage 2 questionnaires. As per stage 1, instruments  
53 327 will be grouped under appropriate domains and full definitions of each instrument will be provided. As  
54 328 stated, participants will be asked to rate each instrument in turn using a 1-9 scale of appropriateness  
55  
56  
57  
58  
59



1  
2  
3 329 (rather than importance). During the first round of the stage 2 instrument selection process , there will be  
4  
5 330 an option for adding text outlining reasons for any given rating and also for suggesting possible additional  
6  
7 331 instruments for measuring or defining outcomes.  
8

9 332

10  
11 333 Analysis of Stage 2, Round 1

12  
13  
14 334 Additional instruments listed by participants will be reviewed by two members of the study team (RMM  
15  
16 335 and JL) to ensure they represent new instruments. All instruments, excluding those rated inappropriate  
17  
18 336 by consensus and including any new instruments, will be carried forward to round 2.  
19

20 337

21  
22 338 Stage 2, Round 2 Delphi

23  
24  
25 339 In round 2, all experts will be asked to rate instruments again. They will be shown their previous rating,  
26  
27 340 the median expert group rating and any free text comments in the hope of ratings reaching a consensus.  
28  
29 341 Experts will be encouraged to rate instruments in a way that shows their preferences.  
30

31 342

32  
33 343 Analysis of Stage 2, Round 2

34  
35  
36 344 It may be that after round 2 an instrument set can be formed. Only those instruments related to an  
37  
38 345 outcome for which there is no established consensus will be carried over to round 3.  
39

40 346 Stage 2, Round 3 Delphi

41  
42 347 In round 3, all experts will be asked to select instruments for the final time. They will be shown their  
43  
44 348 previous rating, the median expert group rating and any free text comments in the hope of ratings  
45  
46 349 reaching a consensus. In this round they will be asked to select the most appropriate instrument for each  
47  
48 350 outcome in a binary format.  
49

50 351

51  
52 352 Analysis of Stage 2, Round 3  
53  
54  
55  
56  
57  
58  
59  
60

1  
2  
3 353 A final instrument set matched to the core outcome set will be formed based on the consensus. In any  
4 354 areas where there is no consensus, the study team will adjudicate, taking account of free text comments.

5  
6  
7 355

8  
9  
10 356 **Data Storage**

11  
12 357 Participants' contact details, including email addresses and telephone numbers, and the answers they  
13 358 provide, will only be stored by Clinivo for the duration of the study. Clinivo will not share participants'  
14 359 contact details with any third parties and participants' answers will be stored anonymously. Data will be  
15 360 encrypted before being stored on Clinivo's server and prior to being transferred to the University of  
16 361 Glasgow. On completion of the study, Clinivo will destroy all data after transferring it to the University  
17 362 of Glasgow. The University will securely store the data on password access computers for a period of ten  
18 363 years following completion of the research project.

19  
20  
21 364

22  
23  
24 365

25  
26  
27 366

28  
29  
30 367

31  
32  
33 368

34  
35  
36 369

37  
38  
39 370

40  
41  
42 371

43  
44  
45 372 **Ethics**

46  
47 373 Ethical approval for this study has been received from the University of Glasgow College of Medical,  
48 374 Veterinary and Life Sciences Ethics Committee.

49  
50  
51 375

52  
53  
54 376 **Dissemination**

1  
2  
3 377 With regard to disseminating the results of our study, we will communicate our results via peer review  
4 378 publication, conference presentations, professional societies and also via our institution's social media  
5 379 platforms.

6  
7  
8  
9 380 In addition, we will submit a report to our funding body, the Chief Scientist Office of the Scottish  
10 381 Government Health Department. We will also share early findings with PHE and Health Scotland. We will  
11 382 be in full discussion with both bodies to ensure that our work informs their evaluation plans for BWMPs  
12 383 for adults with overweight and obesity.

13  
14  
15  
16 384 Our study is, of course, restricted to the UK. This is due to BWMPs and their settings within health services  
17 385 being fairly country-specific. For example, in France and the Netherlands there is no health insurance  
18 386 funding of BWMPs and, in the USA, obesity services are tertiary, combining behavioural programmes with  
19 387 medication and bariatric surgery. In addition, instruments, such as language and health economic models,  
20 388 can be country-specific. However, it our belief that these differences are subtle and that, particularly for  
21 389 trials, our core outcome and definition/instrument sets could be used internationally with some  
22 390 adaptation.

23  
24  
25  
26  
27  
28  
29 391

30  
31  
32 392

33  
34 393

35  
36  
37 394

38  
39 395

40  
41  
42 396

43  
44 397

45  
46  
47 398

48  
49 399 **REFERENCES**

50  
51 400

52  
53 401 (1) National Institute for Health and Care Excellence. Weight Management: lifestyle services for  
54 402 overweight or obese adults (PH53). 2014.

55  
56 403

- 1  
2  
3 404 (2) Scottish Intercollegiate Guidelines Network. Management of Obesity: A national clinical guideline.  
4 405 2010.  
5 406  
6  
7 407 (3) Loveman E, Frampton GK, Shepherd J, Picot J, Cooper K, Bryant J et al. The clinical effectiveness  
8 408 and cost-effectiveness of long-term weight management schemes for adults: a systematic review.  
9 409 *Health Technol Assess* 2011; 15(2):1-182.  
10  
11  
12 410 (4) Read S, Logue J. Variations in weight management services in Scotland: a national survey of weight  
13 411 management provision. *J Public Health (Oxf)* 2016; 38(3):e325-e335.  
14  
15 412 (5) Public Health England. National mapping of weight management services 2015. 2018.  
16 413  
17  
18 414 (6) Public Health England. Standard Evaluation Framework for weight management interventions.  
19 415 2009.  
20 416  
21  
22 417 (7) Hartmann-Boyce J, Johns D, Aveyard P, Lewis A, Jebb S, Phillips D et al. Managing overweight and  
23 418 obese adults: The clinical effectiveness of long-term weight management schemes for adults.  
24 419 2013.  
25 420  
26  
27  
28 421 (8) [https://www.gov.uk/government/publications/adult-weight-management-services-collect-and-](https://www.gov.uk/government/publications/adult-weight-management-services-collect-and-record-data)  
29 422 [record-data](https://www.gov.uk/government/publications/adult-weight-management-services-collect-and-record-data). 2018.  
30 423  
31  
32 424 (9) [https://www.gov.uk/government/publications/adult-weight-management-key-performance-](https://www.gov.uk/government/publications/adult-weight-management-key-performance-indicators)  
33 425 [indicators](https://www.gov.uk/government/publications/adult-weight-management-key-performance-indicators). 2018.  
34 426  
35  
36  
37 427 (10) Coulman KD, Hopkins J, Brookes ST, Chalmers K, Main B, Owen-Smith A et al. A Core Outcome Set  
38 428 for the Benefits and Adverse Events of Bariatric and Metabolic Surgery: The BARIACT Project. *PLoS*  
39 429 *Med* 2016; 13(11):e1002187.  
40  
41 430 (11) Fitch K, Bernstein SJ, Aguilar DM, Burnand B, LaCalle JR, Lazaro P et al. The RAND/UCLA  
42 431 Appropriateness Method User's Manual. 2001. RAND, Santa Monica.  
43 432  
44  
45 433 (12) Park RE, Fink A, Brook RH, Chassin MR, Kahn KL, Merrick NJ et al. Physician ratings of appropriate  
46 434 indications for six medical and surgical procedures. *Am J Public Health* 1986; 76(7):766-772.  
47  
48  
49 435 (13) Eldridge SM, Lancaster GA, Campbell MJ, Thabane L, Hopewell S, Coleman CL et al. Defining  
50 436 Feasibility and Pilot Studies in Preparation for Randomised Controlled Trials: Development of a  
51 437 Conceptual Framework. *PLoS One* 2016; 11(3):e0150205.  
52  
53 438 (14) Froud R, Eldridge S, Kovacs F, Breen A, Bolton J, Dunn K et al. Reporting outcomes of back pain  
54 439 trials: a modified Delphi study. *Eur J Pain* 2011; 15(10):1068-1074.  
55  
56  
57  
58  
59  
60

- 1  
2  
3 440 (15) Petrou S, Rivero-Arias O, Dakin H, Longworth L, Oppe M, Froud R et al. Preferred reporting items  
4 441 for studies mapping onto preference-based outcome measures: The MAPS statement. *J Med Econ*  
5 442 2015; 18(11):851-857.  
6  
7 443 (16) Pincus T, Miles C, Froud R, Underwood M, Carnes D, Taylor SJ. Methodological criteria for the  
8 444 assessment of moderators in systematic reviews of randomised controlled trials: a consensus  
9 445 study. *BMC Med Res Methodol* 2011; 11:14.  
10  
11 446 (17) Pinnock H, Barwick M, Carpenter CR, Eldridge S, Grandes G, Griffiths CJ et al. Standards for  
12 447 Reporting Implementation Studies (StaRI) Statement. *BMJ* 2017; 356:i6795.  
13  
14 448 (18) Taylor WJ, Schumacher HR, Jr., Baraf HS, Chapman P, Stamp L, Doherty M et al. A modified Delphi  
15 449 exercise to determine the extent of consensus with OMERACT outcome domains for studies of  
16 450 acute and chronic gout. *Ann Rheum Dis* 2008; 67(6):888-891.  
17 451  
18 452  
19  
20  
21  
22 453  
23  
24  
25  
26  
27  
28  
29  
30  
31  
32  
33  
34  
35  
36  
37  
38  
39  
40  
41  
42  
43  
44  
45  
46  
47  
48  
49  
50  
51  
52  
53  
54  
55  
56  
57  
58  
59  
60

## 454 **AUTHORS' CONTRIBUTIONS**

455 RMM and JL drafted the protocol. LJE and SAS critically reviewed the protocol. RMM and JL finalised the  
456 protocol.

457

458

## 459 **FUNDING STATEMENT**

460 This work was supported by the Chief Scientist Office of the Scottish Government Health Department,  
461 grant reference number CGA/17/08.

462 SAS was supported by a MRC Strategic Award (MC-PC-13027, MC\_UU\_12017\_14 and SPHSU14).

463

464

## 465 **COMPETING INTERESTS STATEMENT**

466 JL leads a joint working project between University of Glasgow, NHS Greater Glasgow and Clyde, MSD and  
467 Astra Zeneca. The project also involved an educational grant from Janssen. JL received funding to attend  
468 a conference from Novo Nordisk.

469 LJE has a part time secondment with PHE.

470

471

## 472 **FIGURE LEGENDS**

473 **Figure 1. Schematic outlining the two stage Delphi study.** In order to develop a core outcome set and  
474 definition/instrument set, Delphi methodology will be used to gain consensus from expert groups. Two  
475 Delphis (stage 1 and stage 2) will be carried out online over three rounds of questionnaires. The stage 1  
476 Delphi will focus on development of a core outcome set. The stage 2 Delphi will focus on corresponding  
477 definition/instrument selection. PHE, Public Health England; SEF, standard evaluation framework; KPI, key  
478 performance indicator.

1  
2  
3 479  
4  
5  
6 480  
7  
8 481  
9  
10  
11  
12  
13  
14  
15  
16  
17  
18  
19  
20  
21  
22  
23  
24  
25  
26  
27  
28  
29  
30  
31  
32  
33  
34  
35  
36  
37  
38  
39  
40  
41  
42  
43  
44  
45  
46  
47  
48  
49  
50  
51  
52  
53  
54  
55  
56  
57  
58  
59  
60

For peer review only

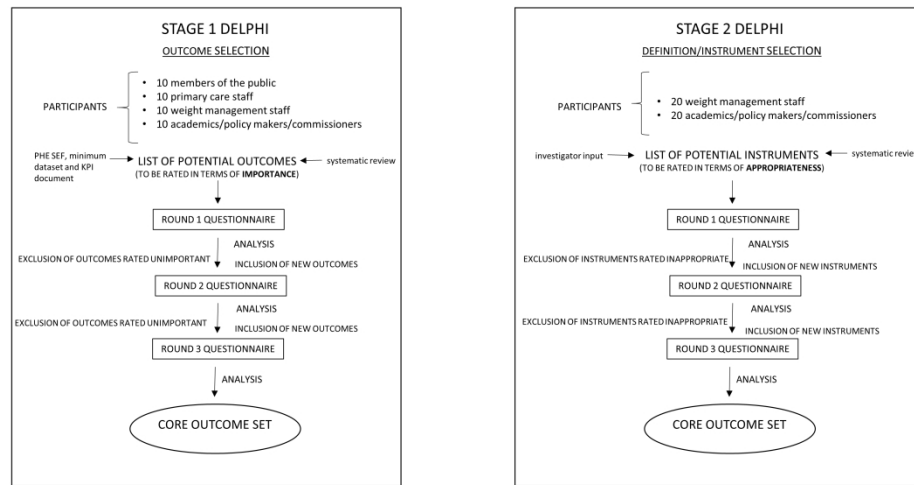

Figure 1. Schematic outlining the two stage Delphi study. In order to develop a core outcome set and definition/instrument set, Delphi methodology will be used to gain consensus from expert groups. Two Delphis (stage 1 and stage 2) will be carried out online over three rounds of questionnaires. The stage 1 Delphi will focus on development of a core outcome set. The stage 2 Delphi will focus on corresponding definition/instrument selection. PHE, Public Health England; SEF, standard evaluation framework; KPI, key performance indicator.

338x190mm (300 x 300 DPI)



# BMJ Open

## Development of a core outcome set for behavioural weight management programmes for adults with overweight and obesity: protocol for obtaining expert consensus using Delphi methodology

|                                 |                                                                                                                                                                                                                                                                                                                                                       |
|---------------------------------|-------------------------------------------------------------------------------------------------------------------------------------------------------------------------------------------------------------------------------------------------------------------------------------------------------------------------------------------------------|
| Journal:                        | <i>BMJ Open</i>                                                                                                                                                                                                                                                                                                                                       |
| Manuscript ID                   | bmjopen-2018-025193.R2                                                                                                                                                                                                                                                                                                                                |
| Article Type:                   | Protocol                                                                                                                                                                                                                                                                                                                                              |
| Date Submitted by the Author:   | 12-Dec-2018                                                                                                                                                                                                                                                                                                                                           |
| Complete List of Authors:       | Mackenzie, Ruth; University of Glasgow, Institute of Cardiovascular and Medical Sciences<br>Ells, Louisa; Teeside University, School of Health and social Care<br>Simpson, Sharon; University of Glasgow, MRC/CSO Social and Public Health Sciences Unit<br>Logue, Jennifer; University of Glasgow, Institute of Cardiovascular and Medical Sciences; |
| <b>Primary Subject Heading</b>: | Public health                                                                                                                                                                                                                                                                                                                                         |
| Secondary Subject Heading:      | Health policy                                                                                                                                                                                                                                                                                                                                         |
| Keywords:                       | core outcomes, lifestyle weight management, Delphi                                                                                                                                                                                                                                                                                                    |
|                                 |                                                                                                                                                                                                                                                                                                                                                       |

SCHOLARONE™  
Manuscripts

1  
2  
3 1 **Development of a core outcome set for behavioural weight management programmes for adults**  
4 **with overweight and obesity: protocol for obtaining expert consensus using Delphi methodology**

5 2  
6  
7 3 *Ruth M. Mackenzie<sup>1</sup>, Louisa J. Ells<sup>2</sup>, Sharon Anne Simpson<sup>3</sup>, Jennifer Logue<sup>1</sup>*  
8

9  
10 4 <sup>1</sup>Institute of Cardiovascular and Medical Sciences, University of Glasgow  
11

12 5 <sup>2</sup>School of Health & Social Care, Teeside University  
13

14 6 <sup>3</sup>Institute of Health and Wellbeing, University of Glasgow  
15  
16

17 7  
18  
19  
20 8 Corresponding Author:  
21

22 9 Jennifer Logue  
23

24  
25 10 Institute of Cardiovascular and Medical Sciences  
26

27 11 University of Glasgow  
28

29  
30 12 126 University Place  
31

32 13 Glasgow  
33

34  
35 14 G12 8TA  
36

37 15 [Jennifer.Logue@glasgow.ac.uk](mailto:Jennifer.Logue@glasgow.ac.uk)  
38  
39

40 16  
41

42 17 **ABSTRACT**  
43

44  
45 18 **Introduction:** Weight management interventions in research studies and in clinical practice differ in  
46 19 length, advice, frequency of meetings, staff, and cost. Very few real-world programmes have  
47 20 published patient-related outcomes, and those that have published used different ways of reporting  
48 21 the information, making it impossible to compare interventions and further develop the evidence  
49 22 base. Developing a core outcome set for behavioural weight management programmes (BWMPs) for  
50 23 adults with overweight and obesity will allow different BWMPs to be compared and reveal which  
51 24 interventions work best for which members of the population.  
52  
53  
54  
55

56  
57 25 **Methods and analysis:** An expert group, comprised of 40 people who work in, refer to, or attend  
58 26 BWMPs for adults with overweight and obesity, will be asked to decide which outcomes services  
59  
60

1  
2  
3 27 should report. An online Delphi process will be employed to help the group reach consensus as to  
4  
5 28 which outcomes should be measured and reported, and which definitions/instruments should be  
6  
7 29 utilised in order to do so. The first stage of the Delphi process (3 rounds of questionnaires) will focus  
8  
9 30 on outcomes while the second stage (3 additional rounds of questionnaires) will focus on  
10  
11 31 definition/instrument selection.

12  
13 32 **Ethics and dissemination:** Ethical approval for this study has been received from the University of  
14  
15 33 Glasgow College of Medical, Veterinary and Life Sciences Ethics Committee. With regard to  
16  
17 34 disseminating results, a report will be submitted to our funding body, the Chief Scientist Office of the  
18  
19 35 Scottish Government Health Department. In addition, early findings will be shared with Public Health  
20  
21 36 England (PHE) and Health Scotland, and results communicated via conference presentations, peer  
22  
23 37 review publication and our institutions' social media platforms.

24  
25 38 **Registration details:** The project has been registered with the COMET (Core Outcome Measures in  
26  
27 39 Effectiveness Trials) Initiative (<http://www.comet-initiative.org/studies/details/1056>).

28  
29  
30  
31  
32  
33  
34  
35  
36  
37  
38  
39  
40

#### 41 **STRENGTHS AND LIMITATIONS OF THIS STUDY**

- 42  
43  
44  
45  
46  
47  
48  
49  
50  
51  
52  
53  
54  
55  
56  
57  
58  
59  
60
- The major strength of this study is that it is the first of its kind and development of a core outcome set for BWMPs for adults with overweight and obesity is much needed in order to standardise reporting which, in turn, will lead to a better evidence base and improvements in weight management provision.
  - It is a limitation that this study is wholly based in the United Kingdom (UK) as the results may need some adaptation to be suited to real-world programmes set within other healthcare systems.
  - The recognised method for core outcome set development, the Delphi method, will be used to garner opinions from a wide range of individuals with expertise in behavioural weight management.
  - Review of all existing qualitative research studies will not be undertaken when generating the initial list of outcomes. However, qualitative work will be performed during core outcome set development as part of the Delphi process.

58

**59 INTRODUCTION**

60 Both the National Institute for Health and Care Excellence (NICE)<sup>1</sup> and Scottish Intercollegiate  
61 Guidelines Network (SIGN)<sup>2</sup> guidelines outline the intervention components to be included in a  
62 community weight management programme, namely calorie restriction, increased physical activity,  
63 and behavioural interventions. These have proven efficacy from randomised controlled trials<sup>3</sup>.  
64 However, their implementation in practice is inconsistent with mapping exercises in Scotland<sup>4</sup> and  
65 England<sup>5</sup> showing wide variation in services in terms of inclusion criteria, referral routes, delivery  
66 format, length and cost. Few real life services have published data and when they do publish, results  
67 can be poor with low levels of completion and 'success', and lack of longer term outcomes.

68 The NICE guidance, 'Weight management: lifestyle services for overweight or obese adults'<sup>1</sup>, identified  
69 a number of evidence gaps. These included, reliance on studies with short follow-up, collection of data  
70 at limited time points, small sample sizes, demographic samples that limit the ability to generalise,  
71 non-reporting of reasons for people dropping out and lack of evidence regarding the effect of  
72 population characteristics, such as age, gender and socio economic status, on the effectiveness of a  
73 service. They noted a lack of comparisons between behavioural weight management programmes  
74 (BWMPs) in the United Kingdom (UK). This lack of an evidence base means that it is not possible to  
75 issue clear guidance as to which services are cost effective for which population groups.

76 Public Health England (PHE) has created a standard evaluation framework (SEF)<sup>6</sup> to aid the evaluation  
77 of real world weight management programmes. However, in their 2015 weight management mapping  
78 exercise<sup>5</sup>, PHE reported that only 46% of adult weight management programmes use the SEF and, as  
79 it simply suggests areas for reporting and potential methods of analysis, there is a huge gap in  
80 standardised reporting. PHE had intended to analyse data from services but analysis was not possible  
81 due to the heterogeneity of reporting which included kilograms, % weight loss, average number of  
82 completers achieving 5% weight loss, body mass index (BMI) and more<sup>5</sup>. With regard to research  
83 studies, evidence suggests similar heterogeneity in terms of the reporting of outcomes<sup>7</sup>.

84 In an attempt to address this reporting issue, PHE issued a minimum dataset<sup>8</sup> which provides an  
85 important core outcome recommendation for England, stipulating collection of certain demographics,  
86 service details, BMI and wellbeing at baseline, on completion of the programme and at 6 months and  
87 12 months post programme. A data collection tool provides information to support the  
88 standardisation of these data collection practices. This minimum dataset will be used to support PHE's  
89 recently released document on adult tier 2 weight management service key performance indicators

1  
2  
3 90 (KPIs)<sup>9</sup> which provides advice as to how weight status and service compliance should be reported and  
4  
5 91 measured.

6  
7 92 The study described herein has been funded through a Chief Scientist Office of the Scottish  
8  
9 93 Government Health Department grant and will serve to further validate and build upon the PHE  
10  
11 94 minimum dataset<sup>8</sup> and KPI document<sup>9</sup>, while also informing a similar framework for Scotland. In  
12  
13 95 addition, our research will provide much needed consensus on the measurements that should be  
14  
15 96 used, such as questionnaires, something currently not covered in the PHE minimum dataset<sup>8</sup> or KPI  
16  
17 97 document<sup>9</sup>. Overall, this work will ensure more consistency in the measurement of the effectiveness  
18  
19 98 of adult weight management services, leading to a better evidence base from which to identify which  
20  
21 99 services are effective across a range of settings.

22 100 Recently, a core outcome set for bariatric and metabolic surgery was successfully developed using  
23  
24 101 consensus methodology<sup>10</sup>. However, outcomes, including perioperative outcomes and post-operative  
25  
26 102 complications, are not relevant for reporting from BWMPs. Therefore, the aim of this study, which will  
27  
28 103 run from November 2017 until November 2018, is to gain expert consensus opinion on the core  
29  
30 104 outcomes that should be reported from behavioural weight management interventions for adults with  
31  
32 105 overweight and obesity in real world clinical practice as well as within research studies.

33 106 The specific study objectives are to:

- 34  
35 107 1. Review the list of outcomes previously reported in the PHE SEF<sup>6</sup>, minimum dataset<sup>8</sup> and KPI  
36  
37 108 document<sup>9</sup>;
- 38  
39 109 2. Identify additional outcomes reported in studies of structured, sustained, multi-component weight  
40  
41 110 management programmes for adults from a systematic review of the literature;
- 42  
43 111 3. Select outcomes for inclusion in the core dataset using consensus methodology;
- 44  
45  
46 112 4. Select definitions/instruments for measuring chosen outcomes using consensus methodology.

47  
48 113

49  
50 114

51  
52 115

53  
54 116

55  
56 117

57  
58  
59  
60

## 118 **METHODS AND ANALYSIS**

### 119 **Identification of outcomes**

120 We will generate a list of outcomes by review of the PHE SEF<sup>6</sup>, which was itself developed from a  
121 systematic review of the literature/focus groups, and from the PHE minimum dataset<sup>8</sup> and KPI  
122 document<sup>9</sup> which were developed through expert consensus and evidence from the peer review and  
123 grey literature.

124 Further outcomes will be selected by a review of included studies in the systematic review, 'The clinical  
125 effectiveness of long-term weight management schemes for adults' by Hartmann-Boyce *et al.* (2013)<sup>7</sup>,  
126 conducted during the development of NICE guidance<sup>1</sup>. This systematic review<sup>7</sup> assessed the effects  
127 of multicomponent BWMPs in overweight and adults with obesity which may be applicable in the UK.  
128 To be considered a multicomponent BWMP, the components of the programme had to include diet,  
129 physical activity and behavioural therapy (for example, counselling sessions). The scope included  
130 commercial weight loss programmes and non-commercial programmes, such as those delivered in  
131 primary care settings (for example, in GP practices)<sup>7</sup>. It updated and expanded on an existing  
132 systematic review published in 2011 by Loveman *et al.*<sup>3</sup> and used similar methods. The Loveman  
133 systematic review<sup>3</sup> sought to assess the long-term clinical effectiveness and cost-effectiveness of  
134 multicomponent weight management schemes for adults in terms of weight loss and maintenance of  
135 weight loss.

136 Additional outcomes will be identified by updating the Hartmann-Boyce systematic review<sup>7</sup>, using  
137 the same inclusion criteria but extending search dates so that studies from 1/11/2012 until 30/09/17  
138 are included. Search and selection criteria for the systematic review are identical to those of  
139 Hartmann-Boyce<sup>7</sup>. With regard to database searches, Hartmann-Boyce<sup>7</sup> searched BIOSIS, the  
140 Cochrane Database of Systematic Reviews, CENTRAL, the Conference Proceedings Citation Index, the  
141 Database of Abstracts of Reviews and Effects (DARE), Embase, the Health Technology Assessment  
142 database, Medline, PsychInfo, and Science Citation Index for references relating to weight loss  
143 programmes. They also screened references from three additional sources: reference lists in  
144 systematic reviews, documents received via the NICE call for evidence, and studies excluded from  
145 Loveman<sup>3</sup> that they wished to re-examine. Studies selected for inclusion had to be structured,  
146 sustained, multi-component adult weight management programmes with interventions which were  
147 a combination of diet and physical activity with a behaviour change strategy to influence lifestyle. In  
148 addition, programmes were required to include a follow-up of more than 12 months and be  
149 delivered in the health sector, in the community or commercially (i.e. applicable to the NHS).

1  
2  
3 150 Two review authors will independently assess the abstracts of studies resulting from our literature  
4  
5 151 search. Full text copies of studies appearing to meet the inclusion criteria will be further independently  
6  
7 152 assessed by the 2 reviewers. Following discussion, agreement will be reached as to which studies to  
8  
9 153 include. Any new outcomes will then be identified from the selected studies from both Hartmann-  
10 154 Boyce<sup>7</sup> and the updated review.  
11

12 155

### 15 156 **Identification of Instruments**

16  
17 157 By review of the studies identified during the systematic reviews previously described, we will list  
18  
19 158 instruments and definitions for selected outcomes. The study investigators will review this list and add  
20  
21 159 any further suitable instruments.  
22

23 160

### 26 161 **Data Analysis and Presentation**

27  
28 162 For analysis purposes, the data will be tabulated so that the outcomes and instruments to be included  
29  
30 163 in our Delphi are listed and the study/studies from which they were identified are displayed. Outcomes  
31  
32 164 and instruments will be grouped under appropriate domains following review of selected outcomes.  
33

34 165

### 36 166 **Patient and Public Involvement**

37  
38  
39 167 We will develop our core outcome set by means of consensus from an expert group. The sampling  
40  
41 168 frame will aim to include members of the public with experience of NHS, local authority or commercial  
42  
43 169 adult BWMPs in the UK, academics/policy makers/commissioners working in weight management,  
44  
45 170 staff currently involved in delivering a BWMP for adults (without significant policy involvement), and  
46  
47 171 primary care staff (referrers). Consensus methodology will ensure that the opinions and preferences  
48  
49 172 of members of the public will be given the same weighting as those of the other experts.

50 173 There is no published agreement on the optimal size of an expert group; pragmatism is required while  
51  
52 174 ensuring a range of opinions is garnered. Experience suggests a greater than 80% completion rate of  
53  
54 175 Delphi questionnaires<sup>10;11</sup>. We will pre-approach potential volunteers to get agreement to participate  
55  
56 176 from 10 members of the public, 20 academics/policy makers/commissioners, 20 weight management  
57  
58 177 staff and 10 primary care staff. Forty experts will complete each of the two separate Delphi processes.  
59  
60

1  
2  
3 178 For the first Delphi process (stage 1, outcome selection), 10 members of the public, 10  
4 179 academics/policy makers/commissioners, 10 weight management staff and 10 primary care staff will  
5 180 be invited to participate.

6  
7  
8  
9 181 For the second Delphi (stage 2, instrument selection), 20 academics/policy makers/commissioners and  
10 182 20 weight management staff will be invited to participate with further members recruited if any of the  
11 183 original group (the 10 from each group who completed stage 1) have dropped out after the stage 1  
12 184 Delphi. The stage 2 Delphi will involve reading papers, looking at metrics and assessing validity of  
13 185 instruments/questionnaires. As in depth knowledge of academic literature and reporting tools is  
14 186 required, this stage of the Delphi process will be restricted to academics/policy  
15 187 makers/commissioners and weight management staff.

16  
17 188 A small monetary incentive (a £35 gift voucher for either John Lewis or Amazon, depending on  
18 189 preference) will be offered to members of the public and primary care staff as this study is not of any  
19 190 direct benefit to them and could not be considered part of their role.

20  
21  
22 191 Staff working in weight management, academics/policy makers/commissioners and primary care staff  
23 192 will be recruited by email from the investigators and their personal contacts, and also via an email  
24 193 from the Association for the Study of Obesity. An information letter outlining the study will be  
25 194 attached to emails. On registering interest in our study, we will ask volunteers from these groups to  
26 195 provide us with information as to their role and geographical location within the UK.

27  
28 196 Members of the public will be recruited by email from the Association for the Study of Obesity (which  
29 197 has lay members) and from professional contacts (a number of weight management programmes have  
30 198 lay members on steering committees). An information letter outlining the study will be attached to  
31 199 emails. (The information letter for the public will be written in lay language and will therefore differ  
32 200 slightly to the information letter for the other groups.) We have also registered with the NIHR People  
33 201 in Research website (<https://www.peopleinresearch.org/>) where our study will be advertised  
34 202 (following review to ensure suitability for a lay audience). Our information letter will be available to  
35 203 download from this website. On registering interest in our study, a 'job description' pro forma will be  
36 204 sent to members of the public via email. They will be asked to complete this pro forma and return it  
37 205 to us by email. The pro forma will provide us with information as to their gender, age, geographical  
38 206 location and experience of BWMPs.

39  
40  
41 207 In addition, Facebook and Twitter will be used to recruit members of the public, weight management  
42 208 staff, academics/policy makers/commissioners and primary care staff. Facebook posts and Tweets will  
43 209 link to a Mailchimp recruitment page where volunteers will be able to register their interest. On doing  
44  
45  
46  
47  
48  
49  
50  
51  
52  
53  
54  
55



1  
2  
3 210 so, they will receive the appropriate information letter. Weight management staff, academics/policy  
4 211 makers/commissioners and primary care staff will be asked to provide us with information as to their  
5 212 role and geographical location within the UK, and members of the public will be asked to complete  
6 213 the job description pro forma.

7  
8  
9  
10 214 Following provision of information regarding role and geographical location from weight management  
11 215 staff, academics/policy makers/commissioners and primary care staff, and the return of completed  
12 216 pro formas from members of the public, selection of volunteers to participate will commence.  
13 217 Selection will be based on our sampling framework which is outlined below. Volunteers will be sent  
14 218 an email to thank them for their interest and inform them if they have been selected to participate or  
15 219 not. A list of selected volunteers' names and email addresses will then be sent to Clinivo  
16 220 ([www.clinivo.com](http://www.clinivo.com), a spin-out company of the University of Warwick) who will be conducting the  
17 221 Delphi process. Clinivo will then contact these individuals by email, providing a link to the online  
18 222 Delphi questionnaire and instructions as to how to complete it.

19 223 On completion of the study, all participants (including members of the public) will be sent (by email)  
20 224 a copy of the final outcome and definition/instrument sets. In addition, where consent has been given,  
21 225 participants (including members of the public) will be named as contributors in the results publication.

22 226

### 23 227 Sampling Framework

24 228 To ensure our volunteers are a representative UK group, of the 20 weight management staff selected,  
25 229 at least 50% will be from England. Similarly, at least 50% of the 20 academic/policy  
26 230 maker/commissioner group will be from England. 8 of the 20 (40%) will be academics, 6 of the 20  
27 231 (30%) will be policy makers and 6 of the 20 (30%) will be commissioners. At least 50% of the 10 primary  
28 232 care staff selected will also be from England. With regard to members of the public, more than 50%  
29 233 will have experience of commercial BWMPs, more than 50% will be of working age, more than 30%  
30 234 will be male and less than 30% will be from any one region of the UK.

31 235

### 32 236 Delphi Survey

33  
34  
35 237 In order to develop our core outcome dataset, Delphi methodology will be used to gain consensus  
36 238 from our expert group. Two Delphis (stage 1 and stage 2) will be carried out using an online system  
37 239 developed and conducted by Clinivo. Each Delphi will be carried out online over three sequential  
38 240 rounds with the same group of participants (Figure 1). For both stage 1 and stage 2 Delphis, only those

241 who complete a questionnaire in round 1 will be eligible to participate in round 2, and only those who  
242 complete round 2 will be eligible to participate in round 3.

243 The stage 1 Delphi will involve asking each expert to score the importance of an outcome measure for  
244 use in weight management service outcome reporting. The scale will run from 1-9 with 1-3 indicating  
245 that the outcome is unimportant, 4-6 indicating that it is neither unimportant nor important and 7-9  
246 indicating that it is important.

247 During the stage 2 Delphi, experts will be asked to score the appropriateness of outcome definitions  
248 and instruments for measurement of outcomes. Again, this will be done using a 1-9 scale with 1-3  
249 indicating that the definition/instrument is inappropriate, 4-6 indicating that it is neither appropriate  
250 nor inappropriate and 7-9 indicating that it is appropriate.

251

## 252 Statistical Analysis

253 To assess disagreement and importance/appropriateness (and thus define consensus) the Research  
254 ANd Development (RAND)/ University of California Los Angeles (UCLA) appropriateness method will  
255 be used<sup>11</sup>. This involves calculating the median score, the inter-percentile range (IPR, 30th and 70th),  
256 and the inter-percentile range adjusted for symmetry (IPRAS), for each item being rated.

257 Fitch *et al.*<sup>11</sup> first explored using the IPR alone in an attempt to develop a method that reproduced  
258 'classic' RAND definitions on panels that were multiples of 3 (which was typical in RAND's early  
259 consensus studies), but could also be extended to larger panel sizes. They found that in cases when  
260 agreement was good, the IPR should be narrow and in cases where there was disagreement, the IPR  
261 should be wide. However, an in-depth examination of the cases of disagreement identified by the IPR  
262 led to the discovery that when the ratings were symmetric, the IPR required to label an indication as  
263 disagreement was smaller than when the ratings were asymmetric, with respect to the middle. To  
264 overcome this, they developed the IPRAS which includes a correction factor for asymmetry (*Equation*  
265 *1*).

### 266 Equation 1

$$267 \text{IPRAS} = \text{IPRr} + (\text{AI} \times \text{CFA})$$

268 *Where IPRr is the inter-percentile range required for disagreement when perfect symmetry exists, AI is*  
269 *the asymmetry index, and CFA is the correction factor for asymmetry.*

270

1  
2  
3 271 The IPRAS is the threshold beyond which the IPR for a particular item indicates disagreement. Using  
4  
5 272 the IPRAS and the IPR to judge disagreement reproduces 'classic' RAND definitions when applied to  
6  
7 273 panels made up of multiples of 3, but can also be applied to panels of any size<sup>11</sup>. Variations on the  
8  
9 274 stringencies of definitions of disagreement exist<sup>12</sup> but similar examples of Delphi studies in health  
10  
11 275 services research have used the classic definition<sup>13-18</sup>. In *Equation 1*, the optimal values for IPRr and  
12  
13 276 CFA were derived following empirical work on a 9-point scale<sup>11</sup>. Fitch *et al.* found that using values of  
14  
15 277 2.35 and 1.5 best reproduced the 'classic' definitions of agreement. These values will be used in this  
16  
17 278 analysis. We will calculate AI as the distance between the central point of the IPR (p30+p70/2) and the  
18  
19 279 central point of the scale (i.e. 5 on a 1-9 point scale.).

20  
21 280 The IPRAS threshold is dependent on the symmetry of ratings about the median. Thus, each item  
22  
23 281 requires a different IPRAS to be calculated. Consequently, the  $i^{\text{th}}$  indication is rated with disagreement  
24  
25 282 if the  $IPR_i > IPRAS_i$ . In previous Delphi studies some have calculated the ratio of these: the  
26  
27 283 disagreement index<sup>14;16;18</sup>. If the disagreement index was less than 1.0, it indicated there was no  
28  
29 284 disagreement for the item in question. However, this is problematic in terms of interpretation because  
30  
31 285 in the case that the IPR is zero, then the ratio is zero, which can cause confusion. For this reason we  
32  
33 286 will present IPR and IPRAS values and simply comment on whether or not there is disagreement (i.e.  
34  
35 287 when  $IPR_i > IPRAS_i$ ).

36  
37 288 Judgement of appropriateness/importance also follows the classic RAND definitions, and this is  
38  
39 289 assessed simply as whether the median rating falls between 1 to 3 (inappropriate/unimportant), 4 and  
40  
41 290 6 (unsure), or 7 and 9 (appropriate/important).

42  
43 291 At the end of each Delphi round, the median rating will be determined for individual  
44  
45 292 outcomes/instruments and the distribution of ratings summarised in analysis conducted by Clinivo  
46  
47 293 and transferred to our research group (Figure 1).

48  
49 294 During both stage 1 and stage 2, participants will be given 2 weeks to complete each round of the  
50  
51 295 Delphi and will be reminded of the deadline for completion before starting the process. Participants  
52  
53 296 will also be sent a reminder email 1 day before the deadline for each round.

54  
55 297

#### 56 298 Stage 1, Round 1 Delphi

57  
58 299 The first Delphi study (stage 1) will be to select outcomes for inclusion in the core dataset. Full  
59  
60 300 instructions will be provided to the expert group prior to completion of stage 1 questionnaires.  
301  
302 301 Outcomes will be grouped under appropriate domains (broadly based on the PHE SEF<sup>6</sup> and broadly

1  
2  
3 302 following the weight management chronological pathway) and full definitions of each domain and  
4  
5 303 outcome will be provided in lay language. Participants will be asked to rate each outcome in turn using  
6  
7 304 the 1-9 scale. During round 1, there will be an option for adding free text outlining reasons for any  
8  
9 305 given rating and also for suggesting possible additional outcomes.

10  
11 306

#### 12 13 307 Analysis of Stage 1, Round 1

14  
15 308 Additional outcomes listed by participants will be reviewed by two members of the study team (RMM  
16  
17 309 and JL) to ensure they represent new outcomes. All outcomes, excluding any rated unimportant by  
18  
19 310 consensus and including any new outcomes, will be carried forward to round 2.

20  
21 311

#### 22 23 24 312 Stage 1, Round 2 Delphi

25  
26 313 In round 2, all experts will be asked to rate outcomes again. They will be shown their previous rating,  
27  
28 314 the median expert group rating and any free text comments in the hope of ratings reaching a  
29  
30 315 consensus. Experts will be asked to strongly consider the priority outcomes for weight management  
31  
32 316 reporting in this round. Additional questions will be added as to the appropriate number of items to  
33  
34 317 be included in the core outcome set.

35  
36 318

#### 37 38 319 Analysis of Stage 1, Round 2

39  
40 320 All outcomes, excluding any rated unimportant by consensus and including any new outcomes, will be  
41  
42 321 carried forward to round 3.

43  
44 322

#### 45 46 47 323 Stage 1, Round 3 Delphi

48  
49 324 In round 3, all experts will be asked to rate outcomes for the final time. They will be shown their  
50  
51 325 previous rating, the median expert group rating and any free text comments in the hope of ratings  
52  
53 326 reaching a consensus. Should it be the case that a large number of outcomes are being rated as  
54  
55 327 important at this stage, the need to decide which outcomes should take priority for weight  
56  
57 328 management reporting will be reinforced to experts and they will be asked to rate only these priority  
58  
59 329 outcomes as important. This will ensure development of a core outcome set of a manageable/practical  
60  
330 size.

1  
2  
3 331 Analysis of Stage 1, Round 3  
4

5  
6 332 Using the consensus on the outcome set size and importance of outcomes, an outcome set will be  
7 333 developed by the study team using the results of the Delphi.  
8  
9

10 334

11  
12 335 Stage 2, Round 1 Delphi  
13

14  
15 336 The second Delphi study (stage 2) will be for definition/instrument selection. Selection of instruments  
16 337 for inclusion in the stage 2 Delphi will be informed, as previously stated, by results/ratings/suggestions  
17 338 from stage 1, systematic review and input from co-investigators (LJE and SAS).  
18  
19

20  
21 339 Full instructions will be provided prior to completion of stage 2 questionnaires. As per stage 1,  
22 340 instruments will be grouped under appropriate domains and full definitions of each instrument will  
23 341 be provided. As stated, participants will be asked to rate each instrument in turn using a 1-9 scale of  
24 342 appropriateness (rather than importance). During the first round of the stage 2 instrument selection  
25 343 process , there will be an option for adding text outlining reasons for any given rating and also for  
26 344 suggesting possible additional instruments for measuring or defining outcomes.  
27  
28  
29

30 345

31  
32  
33  
34 346 Analysis of Stage 2, Round 1  
35

36  
37 347 Additional instruments listed by participants will be reviewed by two members of the study team  
38 348 (RMM and JL) to ensure they represent new instruments. All instruments, excluding those rated  
39 349 inappropriate by consensus and including any new instruments, will be carried forward to round 2.  
40  
41

42 350

43  
44  
45 351 Stage 2, Round 2 Delphi  
46

47  
48 352 In round 2, all experts will be asked to rate instruments again. They will be shown their previous rating,  
49 353 the median expert group rating and any free text comments in the hope of ratings reaching a  
50 354 consensus. Experts will be encouraged to rate instruments in a way that shows their preferences.  
51  
52

53 355

54  
55  
56 356 Analysis of Stage 2, Round 2  
57

58  
59 357 It may be that after round 2 an instrument set can be formed. Only those instruments related to an  
60 358 outcome for which there is no established consensus will be carried over to round 3.

1  
2  
3 359 Stage 2, Round 3 Delphi  
4

5  
6 360 In round 3, all experts will be asked to select instruments for the final time. They will be shown their  
7  
8 361 previous rating, the median expert group rating and any free text comments in the hope of ratings  
9  
10 362 reaching a consensus. In this round they will be asked to select the most appropriate instrument for  
11  
12 363 each outcome in a binary format.

13 364

14  
15  
16 365 Analysis of Stage 2, Round 3

17  
18 366 A final instrument set matched to the core outcome set will be formed based on the consensus. In any  
19  
20 367 areas where there is no consensus, the study team will adjudicate, taking account of free text  
21  
22 368 comments.

23  
24 369

25  
26 370 Data Storage

27  
28  
29 371 Participants' contact details, including email addresses and telephone numbers, and the answers they  
30  
31 372 provide, will only be stored by Clinivo for the duration of the study. Clinivo will not share  
32  
33 373 participants' contact details with any third parties and participants' answers will be stored  
34  
35 374 anonymously. Data will be encrypted before being stored on Clinivo's server and prior to being  
36  
37 375 transferred to the University of Glasgow. On completion of the study, Clinivo will destroy all data  
38  
39 376 after transferring it to the University of Glasgow. The University will securely store the data on  
40  
41 377 password access computers for a period of ten years following completion of the research project.

42 378

43  
44 379

45  
46 380

47  
48  
49 381

50  
51 382

52  
53 383

54  
55  
56 384

57  
58  
59 385  
60

1  
2  
3 386 **Ethics**  
4

5  
6 387 Ethical approval for this study has been received from the University of Glasgow College of Medical,  
7 388 Veterinary and Life Sciences Ethics Committee.  
8  
9

10 389

11  
12 390 **Dissemination**  
13

14  
15 391 With regard to disseminating the results of our study, we will communicate our results via peer review  
16 392 publication, conference presentations, professional societies and also via our institution's social media  
17 393 platforms.  
18  
19

20  
21 394 In addition, we will submit a report to our funding body, the Chief Scientist Office of the Scottish  
22 395 Government Health Department. We will also share early findings with PHE and Health Scotland. We  
23 396 will be in full discussion with both bodies to ensure that our work informs their evaluation plans for  
24 397 BWMPs for adults with overweight and obesity.  
25  
26  
27

28 398 Our study is, of course, restricted to the UK. This is due to BWMPs and their settings within health  
29 399 services being fairly country-specific. For example, in France and the Netherlands there is no health  
30 400 insurance funding of BWMPs and, in the USA, obesity services are tertiary, combining behavioural  
31 401 programmes with medication and bariatric surgery. In addition, instruments, such as language and  
32 402 health economic models, can be country-specific. Therefore, if used in an international context for  
33 403 trials or real world services, our core outcome and definition/instrument set may require further  
34 404 adaptation.  
35  
36  
37  
38  
39

40 405

41 406

42 407

43 408

44 409

45 410

46 411

47 412  
48  
49  
50  
51  
52  
53  
54  
55  
56  
57  
58  
59  
60

## 413 REFERENCES

414

415 (1) National Institute for Health and Care Excellence. Weight Management: lifestyle services for  
416 overweight or obese adults (PH53). 2014.

417

418 (2) Scottish Intercollegiate Guidelines Network. Management of Obesity: A national clinical  
419 guideline. 2010.

420

421 (3) Loveman E, Frampton GK, Shepherd J, Picot J, Cooper K, Bryant J et al. The clinical  
422 effectiveness and cost-effectiveness of long-term weight management schemes for adults: a  
423 systematic review. *Health Technol Assess* 2011; 15(2):1-182.

424 (4) Read S, Logue J. Variations in weight management services in Scotland: a national survey of  
425 weight management provision. *J Public Health (Oxf)* 2016; 38(3):e325-e335.

426 (5) Public Health England. National mapping of weight management services 2015. 2018.

427

428 (6) Public Health England. Standard Evaluation Framework for weight management  
429 interventions. 2009.

430

431 (7) Hartmann-Boyce J, Johns D, Aveyard P, Lewis A, Jebb S, Phillips D et al. Managing overweight  
432 and obese adults: The clinical effectiveness of long-term weight management schemes for  
433 adults. 2013.

434

435 (8) [https://www.gov.uk/government/publications/adult-weight-management-services-collect-](https://www.gov.uk/government/publications/adult-weight-management-services-collect-and-record-data)  
436 [and-record-data](https://www.gov.uk/government/publications/adult-weight-management-services-collect-and-record-data). 2018.

437

438 (9) [https://www.gov.uk/government/publications/adult-weight-management-key-](https://www.gov.uk/government/publications/adult-weight-management-key-performance-indicators)  
439 [performance-indicators](https://www.gov.uk/government/publications/adult-weight-management-key-performance-indicators). 2018.

440

441 (10) Coulman KD, Hopkins J, Brookes ST, Chalmers K, Main B, Owen-Smith A et al. A Core Outcome  
442 Set for the Benefits and Adverse Events of Bariatric and Metabolic Surgery: The BARIACT  
443 Project. *PLoS Med* 2016; 13(11):e1002187.

444

445 (11) Fitch K, Bernstein SJ, Aguilar DM, Burnand B, LaCalle JR, Lazaro P et al. The RAND/UCLA  
446 Appropriateness Method User's Manual. 2001. RAND, Santa Monica.

447

448 (12) Park RE, Fink A, Brook RH, Chassin MR, Kahn KL, Merrick NJ et al. Physician ratings of  
449 appropriate indications for six medical and surgical procedures. *Am J Public Health* 1986;  
76(7):766-772.

450

451

452

453

454

455

456

457

458



- 1  
2  
3 450 (13) Eldridge SM, Lancaster GA, Campbell MJ, Thabane L, Hopewell S, Coleman CL et al. Defining  
4 451 Feasibility and Pilot Studies in Preparation for Randomised Controlled Trials: Development of  
5 452 a Conceptual Framework. *PLoS One* 2016; 11(3):e0150205.
- 7 453 (14) Froud R, Eldridge S, Kovacs F, Breen A, Bolton J, Dunn K et al. Reporting outcomes of back pain  
8 454 trials: a modified Delphi study. *Eur J Pain* 2011; 15(10):1068-1074.
- 10 455 (15) Petrou S, Rivero-Arias O, Dakin H, Longworth L, Oppe M, Froud R et al. Preferred reporting  
11 456 items for studies mapping onto preference-based outcome measures: The MAPS statement.  
12 457 *J Med Econ* 2015; 18(11):851-857.
- 15 458 (16) Pincus T, Miles C, Froud R, Underwood M, Carnes D, Taylor SJ. Methodological criteria for the  
16 459 assessment of moderators in systematic reviews of randomised controlled trials: a consensus  
17 460 study. *BMC Med Res Methodol* 2011; 11:14.
- 19 461 (17) Pinnock H, Barwick M, Carpenter CR, Eldridge S, Grandes G, Griffiths CJ et al. Standards for  
20 462 Reporting Implementation Studies (StaRI) Statement. *BMJ* 2017; 356:i6795.
- 23 463 (18) Taylor WJ, Schumacher HR, Jr., Baraf HS, Chapman P, Stamp L, Doherty M et al. A modified  
24 464 Delphi exercise to determine the extent of consensus with OMERACT outcome domains for  
25 465 studies of acute and chronic gout. *Ann Rheum Dis* 2008; 67(6):888-891.
- 26 466  
27 467  
28  
29  
30 468

1  
2  
3 469 **AUTHORS' CONTRIBUTIONS**  
4

5  
6 470 RMM and JL drafted the protocol. LJE and SAS critically reviewed the protocol. RMM and JL finalised  
7 471 the protocol.  
8  
9

10 472

11  
12 473  
13

14  
15 474 **FUNDING STATEMENT**  
16

17 475 This work was supported by the Chief Scientist Office of the Scottish Government Health Department,  
18 476 grant reference number CGA/17/08.  
19

20  
21 477 SAS was supported by a MRC Strategic Award (MC-PC-13027, MC\_UU\_12017\_14 and SPHSU14).  
22

23 478  
24

25  
26 479  
27

28  
29 480 **COMPETING INTERESTS STATEMENT**  
30

31 481 JL leads a joint working project between University of Glasgow, NHS Greater Glasgow and Clyde, MSD  
32 482 and Astra Zeneca. The project also involved an educational grant from Janssen. JL received funding to  
33 483 attend a conference from Novo Nordisk.  
34

35  
36 484 LJE has a part time secondment with PHE.  
37  
38

39 485  
40

41  
42 486  
43

44  
45 487 **FIGURE LEGENDS**  
46

47 488 **Figure 1. Schematic outlining the two stage Delphi study.** In order to develop a core outcome set and  
48 489 definition/instrument set, Delphi methodology will be used to gain consensus from expert groups.  
49 490 Two Delphis (stage 1 and stage 2) will be carried out online over three rounds of questionnaires. The  
50 491 stage 1 Delphi will focus on development of a core outcome set. The stage 2 Delphi will focus on  
51 492 corresponding definition/instrument selection. PHE, Public Health England; SEF, standard evaluation  
52 493 framework; KPI, key performance indicator.  
53  
54  
55  
56

57  
58 494  
59  
60

1  
2  
3  
4  
5  
6  
7  
8  
9  
10  
11  
12  
13  
14  
15  
16  
17  
18  
19  
20  
21  
22  
23  
24  
25  
26  
27  
28  
29  
30  
31  
32  
33  
34  
35  
36  
37  
38  
39  
40  
41  
42  
43  
44  
45  
46  
47  
48  
49  
50  
51  
52  
53  
54  
55  
56  
57  
58  
59  
60

495

496

For peer review only



Figure 1. Schematic outlining the two stage Delphi study. In order to develop a core outcome set and definition/instrument set, Delphi methodology will be used to gain consensus from expert groups. Two Delphis (stage 1 and stage 2) will be carried out online over three rounds of questionnaires. The stage 1 Delphi will focus on development of a core outcome set. The stage 2 Delphi will focus on corresponding definition/instrument selection. PHE, Public Health England; SEF, standard evaluation framework; KPI, key performance indicator.

338x190mm (300 x 300 DPI)
